# Supplementary material for: Human abdominal subcutaneous-derived active beige adipocytes carrying FTO rs1421085 obesity-risk alleles exert lower thermogenic capacity
Source: Front Cell Dev Biol. 2023 Jun 14;11:1155673. doi: 10.3389/fcell.2023.1155673 (PMC10321670; doi:10.3389/fcell.2023.1155673)
Supplement: Supplementary file 1 [file DataSheet1.DOCX]

Supplementary Material

Human Abdominal Subcutaneous-Derived Active Beige Adipocytes Carrying *FTO* rs1421085 Obesity-Risk Alleles Exert Lower Thermogenic Capacity

Attila Vámos1,2,†, Rini Arianti1,3,†, Boglárka Ágnes Vinnai1,2, Rahaf Alrifai1,2, Abhirup Shaw1, Szilárd Póliska4, Andrea Guba2,5, Éva Csősz5, István Csomós6, Gábor Mocsár6, Cecilia Lányi7, Zoltán Balajthy1, László Fésüs1, Endre Kristóf1,*

*** Correspondence:** Endre Kristóf: kristof.endre@med.unideb.hu

# Supplementary Figures and Tables

## Supplementary Figures

**Supplementary Figure 1.** Heatmap displaying the expression pattern of BATLAS markers of differentiated abdominal subcutaneous adipocytes carrying risk-free TT or obesity-risk CC alleles at *FTO* rs1421085, n=4 of each genotype.

**Supplementary Figure 2.** Heatmap displaying the expression pattern of ProFAT markers of differentiated abdominal subcutaneous adipocytes carrying risk-free TT or obesity-risk CC alleles at *FTO* rs1421085, n=4 of each genotype.

**Supplementary Figure 3.** The effect of *FTO* rs1421085 SNP on the gene expression pattern of active beige adipocytes as compared to white or inactive beige adipocytes. (A-B) Higher (A) and lower (B) expressed genes in active beige as compared to white adipocytes carrying *FTO* TT or CC. (C) Overrepresented pathways which are less expressed in active beige as compared to white differentiated adipocytes carrying *FTO* CC/obesity-risk variant. Numbers on the right side indicate the number of genes involved in the pathways. (D-E) Higher (D) and lower (E) expressed genes in active beige as compared to inactive beige adipocytes carrying *FTO* TT or CC. (F) Overrepresented pathways which are less expressed in active beige as compared to inactive beige differentiated adipocytes carrying *FTO* CC/obesity-risk variant. Numbers on the right side indicate the number of genes involved in the pathways.

**Supplementary Figure 4**. The effect of the differentiation protocols and alleles at *FTO* rs1421085 on the stimulated etomoxir (ETO)-sensitive oxygen consumption quantified in white, active beige, and inactive beige adipocytes carrying *FTO* risk-free or obesity risk genotypes by Seahorse extracellular flux analysis, n=4 of each genotype.

**Supplementary Figure 5.** The effect of differentiation protocols and alleles at *FTO* rs1421085 on the amino acid fluxes of differentiated abdominal subcutaneous adipocytes. Amino acid fluxes were measured in the conditioned media of differentiated abdominal subcutaneous adipocytes, n=4 of each genotype. Statistical analysis was performed by ANOVA. */#p<0.05 and **/##p<0.01. *analysis was performed to compare the effect of the applied differentiation protocol in the same genotype. #analysis was performed to compare *FTO* rs1421085 TT and CC genotypes within the same differentiation protocol.

**Supplementary Figure 6.** The mRNA expression of *UCP1* in abdominal subcutaneous adipocytes differentiated under white, beige, beige to white transition (B-to-W), active beige, or inactive beige protocols for 28 days, analyzed by RT-qPCR. In the case of B-to-W and inactive beige protocols, the beige differentiation cocktail was replaced to white at day 14. In the case of active beige and inactive beige protocols, adipocytes received a single bolus treatment of dibutyryl-cAMP at 500 μM concentration for 4 hours at day 14. Statistical analysis was performed by ANOVA, n=3, *p<0.05 and **p<0.01.

## Supplementary Tables

**Supplementary Table 1.** Table listing details of donors involved in this study

| **Donor number** | **Gender** | **Age** | ***FTO* rs1421085 genotype** |
| --- | --- | --- | --- |
| 1 | F | 40 | TT |
| 2 | F | 46 | TT |
| 3 | M | 26 | TT |
| 4 | F | 23 | TT |
| 5 | F | 30 | CC |
| 6 | F | 51 | CC |
| 7 | M | 52 | CC |
| 8 | F | 54 | CC |

**Supplementary Table 2.** Gene primers and probes

| **GENES** | **ASSAY ID** |
| --- | --- |
| *UCP1* | Hs00222453_m1 |
| *UCP2* | Hs01075227_m1 |
| *PM20D1* | Hs00399438_m1 |
| *CIDEA* | Hs00154455_m1 |
| *CITED1* | Hs00918445_g1 |
| *CKMT1A/B* | Hs00179727_m1 |
| *CKMT2* | Hs00176502_m1 |
| *CPT2* | Hs00988962_m1 |
| *PLIN1* | Hs00160173_m1 |
| *S100b* | Hs00902901_m1 |
| *SLC7A10* | Hs00219813_m1 |
| *SHMT1* | Hs00541043_g1 |
| *GPT2* | Hs00370287_m1 |
| *GAPDH* | Hs99999905_m1 |
| *ACTB* | Hs01060665_g1 |

**Supplementary Table 3.** Differentially expressed genes (DEGs) from comparison of active beige and white adipocytes; n=8

| **Symbol** | **Gene Name** | **Log2 Fold Change** | **Adj. P value** |
| --- | --- | --- | --- |
| *KRT79* | keratin 79 | 2.43 | 2.37E-11 |
| *CD96* | CD96 molecule | 2.40 | 5.82E-11 |
| *PCK1* | phosphoenolpyruvate carboxykinase 1 | 2.40 | 1.55E-12 |
| *PM20D1* | peptidase M20 domain containing 1 | 2.22 | 1.38E-08 |
| *CPA4* | carboxypeptidase A4 | 2.20 | 3.95E-10 |
| *KCNA1* | potassium voltage-gated channel subfamily A member 1 | 2.10 | 2.08E-10 |
| *SCN4A* | sodium voltage-gated channel alpha subunit 4 | 2.04 | 2.49E-08 |
| *LAMP3* | lysosomal associated membrane protein 3 | 1.94 | 1.27E-06 |
| *FNDC1* | fibronectin type III domain containing 1 | 1.94 | 2.94E-08 |
| *FCN1* | ficolin 1 | 1.91 | 2.24E-06 |
| *AQP3* | aquaporin 3 (Gill blood group) | 1.81 | 2.71E-07 |
| *C1QTNF3* | C1q and TNF related 3 | 1.78 | 2.11E-06 |
| *THBD* | thrombomodulin | 1.77 | 5.37E-08 |
| *SLC7A10* | solute carrier family 7 member 10 | 1.77 | 1.37E-05 |
| *SLC22A12* | solute carrier family 22 member 12 | 1.73 | 3.58E-05 |
| *TENT5C* | terminal nucleotidyltransferase 5C | 1.72 | 1.08E-07 |
| *SLC24A2* | solute carrier family 24 member 2 | 1.69 | 6.53E-05 |
| *CD52* | CD52 molecule | 1.66 | 4.82E-05 |
| *GAP43* | growth associated protein 43 | 1.64 | 0.000107485 |
| *CTXN1* | cortexin 1 | 1.64 | 2.26E-08 |
| *BBOX1* | gamma-butyrobetaine hydroxylase 1 | 1.64 | 7.62E-05 |
| *LINC02554* | long intergenic non-protein coding RNA 2554 | 1.62 | 0.000156997 |
| *TSHR* | thyroid stimulating hormone receptor | 1.59 | 0.000215184 |
| *KCNK12* | potassium two pore domain channel subfamily K member 12 | 1.58 | 0.000242958 |
| *MEST* | mesoderm specific transcript | 1.55 | 1.45E-10 |
| *ZNF365* | zinc finger protein 365 | 1.54 | 2.13E-07 |
| *CPA2* | carboxypeptidase A2 | 1.54 | 0.000314379 |
| *MAP3K7CL* | MAP3K7 C-terminal like | 1.53 | 3.53E-10 |
| *IL1B* | interleukin 1 beta | 1.52 | 0.000156997 |
| *EPB41L4B* | erythrocyte membrane protein band 4.1 like 4B | 1.52 | 5.83E-08 |
| *RTKN2* | rhotekin 2 | 1.50 | 6.91E-08 |
| *TMEM200C* | transmembrane protein 200C | 1.50 | 8.95E-05 |
| *TMEM130* | transmembrane protein 130 | 1.48 | 0.000751043 |
| *PDZD2* | PDZ domain containing 2 | 1.47 | 1.72E-05 |
| *LOC100507560* | uncharacterized LOC100507560 | 1.46 | 0.000189853 |
| *PPP1R14C* | protein phosphatase 1 regulatory inhibitor subunit 14C | 1.45 | 0.000889281 |
| *KCNK15* | potassium two pore domain channel subfamily K member 15 | 1.45 | 1.38E-05 |
| *ECSCR* | endothelial cell surface expressed chemotaxis and apoptosis regulator | 1.44 | 0.000937479 |
| *CEMIP* | cell migration inducing hyaluronidase 1 | 1.43 | 1.94E-05 |
| *LINGO1* | leucine rich repeat and Ig domain containing 1 | 1.41 | 0.000178003 |
| *KCNMA1* | potassium calcium-activated channel subfamily M alpha 1 | 1.41 | 0.000622242 |
| *RBM24* | RNA binding motif protein 24 | 1.41 | 5.75E-08 |
| *STX11* | syntaxin 11 | 1.41 | 5.37E-08 |
| *CDH6* | cadherin 6 | 1.39 | 0.000402281 |
| *CLDN2* | claudin 2 | 1.39 | 0.001821264 |
| *SORL1* | sortilin related receptor 1 | 1.38 | 0.001236163 |
| *ADAMTS14* | ADAM metallopeptidase with thrombospondin type 1 motif 14 | 1.37 | 0.000177898 |
| *LOC100506253* | uncharacterized LOC100506253 | 1.37 | 0.002219581 |
| *CIART* | circadian associated repressor of transcription | 1.36 | 7.13E-15 |
| *TAGAP* | T cell activation RhoGTPase activating protein | 1.35 | 0.002422638 |
| *CA3* | carbonic anhydrase 3 | 1.34 | 0.003390067 |
| *KIRREL3* | kirre like nephrin family adhesion molecule 3 | 1.34 | 0.001332712 |
| *GK* | glycerol kinase | 1.32 | 3.32E-05 |
| *CYS1* | cystin 1 | 1.31 | 5.88E-07 |
| *RGL3* | ral guanine nucleotide dissociation stimulator like 3 | 1.30 | 0.000607669 |
| *CASZ1* | castor zinc finger 1 | 1.30 | 0.001332712 |
| *PRAG1* | PEAK1 related, kinase-activating pseudokinase 1 | 1.30 | 0.003661237 |
| *ABCG1* | ATP binding cassette subfamily G member 1 | 1.30 | 0.000100674 |
| *RFPL4B* | ret finger protein like 4B | 1.30 | 0.003092843 |
| *ICA1* | islet cell autoantigen 1 | 1.29 | 0.000281869 |
| *LOC100507006* | uncharacterized LOC100507006 | 1.29 | 0.001493056 |
| *NA* | NA | 1.29 | 0.005606153 |
| *KLHDC7B* | kelch domain containing 7B | 1.28 | 0.006574118 |
| *NA* | NA | 1.26 | 0.006876331 |
| *LMO2* | LIM domain only 2 | 1.25 | 0.000269485 |
| *ADAMTS18* | ADAM metallopeptidase with thrombospondin type 1 motif 18 | 1.23 | 0.0104071 |
| *EPHB2* | EPH receptor B2 | 1.23 | 1.97E-05 |
| *SCAMP5* | secretory carrier membrane protein 5 | 1.22 | 0.001166631 |
| *TMEM63C* | transmembrane protein 63C | 1.22 | 0.011482877 |
| *SLC22A3* | solute carrier family 22 member 3 | 1.21 | 0.000821422 |
| *ITGA8* | integrin subunit alpha 8 | 1.20 | 0.005161367 |
| *MYOM3* | myomesin 3 | 1.18 | 0.014018549 |
| *ADAM12* | ADAM metallopeptidase domain 12 | 1.17 | 0.001221323 |
| *MYL4* | myosin light chain 4 | 1.17 | 0.01316891 |
| *NREP* | neuronal regeneration related protein | 1.16 | 0.005021214 |
| *HOXD1* | homeobox D1 | 1.16 | 0.008846877 |
| *IQCA1* | IQ motif containing with AAA domain 1 | 1.15 | 0.00189403 |
| *STAC* | SH3 and cysteine rich domain | 1.15 | 0.001409092 |
| *CITED1* | Cbp/p300 interacting transactivator with Glu/Asp rich carboxy-terminal domain 1 | 1.14 | 0.010822663 |
| *KRT80* | keratin 80 | 1.14 | 0.013421498 |
| *INA* | internexin neuronal intermediate filament protein alpha | 1.14 | 0.009387775 |
| *CIDEA* | cell death inducing DFFA like effector a | 1.14 | 0.022804912 |
| *CYP26A1* | cytochrome P450 family 26 subfamily A member 1 | 1.13 | 0.023417525 |
| *CSDC2* | cold shock domain containing C2 | 1.13 | 0.000730888 |
| *PPP1R1A* | protein phosphatase 1 regulatory inhibitor subunit 1A | 1.13 | 0.019974952 |
| *AP3B2* | adaptor related protein complex 3 subunit beta 2 | 1.12 | 0.011744388 |
| *FGF13* | fibroblast growth factor 13 | 1.12 | 0.010973719 |
| *E2F7* | E2F transcription factor 7 | 1.12 | 0.001400194 |
| *CXADRP3* | CXADR pseudogene 3 | 1.12 | 0.020497723 |
| *EPHA2* | EPH receptor A2 | 1.12 | 0.004129368 |
| *RAB39B* | RAB39B, member RAS oncogene family | 1.12 | 0.020181492 |
| *NDUFA4L2* | NDUFA4 mitochondrial complex associated like 2 | 1.10 | 0.001531789 |
| *NA* | NA | 1.10 | 0.028586024 |
| *HAS3* | hyaluronan synthase 3 | 1.10 | 0.002527803 |
| *RSPO3* | R-spondin 3 | 1.09 | 0.028518081 |
| *RTN4R* | reticulon 4 receptor | 1.09 | 0.008569867 |
| *DLX3* | distal-less homeobox 3 | 1.09 | 0.022055084 |
| *PLIN5* | perilipin 5 | 1.09 | 0.017677372 |
| *SELPLG* | selectin P ligand | 1.09 | 0.000121056 |
| *APLP1* | amyloid beta precursor like protein 1 | 1.09 | 0.002758266 |
| *PCDH19* | protocadherin 19 | 1.08 | 0.008475504 |
| *RGS7BP* | regulator of G protein signaling 7 binding protein | 1.08 | 0.020727321 |
| *HRH2* | histamine receptor H2 | 1.08 | 0.035283159 |
| *CKMT1B* | creatine kinase, mitochondrial 1B | 1.08 | 0.021991002 |
| *CX3CR1* | C-X3-C motif chemokine receptor 1 | 1.08 | 0.036754041 |
| *OASL* | 2'-5'-oligoadenylate synthetase like | 1.07 | 0.029556704 |
| *ANOS1* | anosmin 1 | 1.07 | 0.028285618 |
| *STK33* | serine/threonine kinase 33 | 1.07 | 0.020727321 |
| *NRG1* | neuregulin 1 | 1.07 | 0.034815048 |
| *CH25H* | cholesterol 25-hydroxylase | 1.07 | 0.018722712 |
| *PALMD* | palmdelphin | 1.07 | 0.018125851 |
| *HCAR3* | hydroxycarboxylic acid receptor 3 | 1.06 | 0.026478959 |
| *SAMD10* | sterile alpha motif domain containing 10 | 1.06 | 1.37E-05 |
| *SLITRK6* | SLIT and NTRK like family member 6 | 1.05 | 0.025144925 |
| *RTN1* | reticulon 1 | 1.05 | 0.026215254 |
| *SLCO2A1* | solute carrier organic anion transporter family member 2A1 | 1.05 | 0.016809637 |
| *PDE1B* | phosphodiesterase 1B | 1.05 | 0.037056444 |
| *TGM1* | transglutaminase 1 | 1.05 | 0.026513345 |
| *HERC5* | HECT and RLD domain containing E3 ubiquitin protein ligase 5 | 1.05 | 0.04518502 |
| *SAMD12* | sterile alpha motif domain containing 12 | 1.04 | 0.032591111 |
| *PLPPR4* | phospholipid phosphatase related 4 | 1.04 | 0.033802231 |
| *EXTL1* | exostosin like glycosyltransferase 1 | 1.04 | 0.047854579 |
| *NA* | NA | 1.04 | 0.037056444 |
| *DAO* | D-amino acid oxidase | 1.04 | 0.049634866 |
| *REN* | renin | 1.03 | 0.042511987 |
| *ADAMTS16* | ADAM metallopeptidase with thrombospondin type 1 motif 16 | 1.03 | 0.028518081 |
| *ABCA3* | ATP binding cassette subfamily A member 3 | 1.03 | 0.005227157 |
| *RHPN1* | rhophilin Rho GTPase binding protein 1 | 1.03 | 0.018125851 |
| *FUCA1* | alpha-L-fucosidase 1 | 1.02 | 1.32E-05 |
| *ADGRG1* | adhesion G protein-coupled receptor G1 | 1.02 | 0.003171108 |
| *MGAT3* | beta-1,4-mannosyl-glycoprotein 4-beta-N-acetylglucosaminyltransferase | 1.01 | 0.019622647 |
| *TGFB3* | transforming growth factor beta 3 | 0.99 | 0.006348203 |
| *IGFBPL1* | insulin like growth factor binding protein like 1 | 0.98 | 0.010969325 |
| *DOK5* | docking protein 5 | 0.98 | 4.47E-11 |
| *INPP5J* | inositol polyphosphate-5-phosphatase J | 0.97 | 0.044715424 |
| *IL20RA* | interleukin 20 receptor subunit alpha | 0.96 | 0.000342765 |
| *LAMC3* | laminin subunit gamma 3 | 0.96 | 0.049941894 |
| *ASPHD2* | aspartate beta-hydroxylase domain containing 2 | 0.95 | 0.0005617 |
| *RUBCNL* | rubicon like autophagy enhancer | 0.95 | 0.030413861 |
| *GPC1* | glypican 1 | 0.95 | 4.18E-06 |
| *TTC9* | tetratricopeptide repeat domain 9 | 0.95 | 0.041059956 |
| *DACT3* | dishevelled binding antagonist of beta catenin 3 | 0.94 | 0.0005617 |
| *DUSP8* | dual specificity phosphatase 8 | 0.94 | 0.000874179 |
| *LRRC73* | leucine rich repeat containing 73 | 0.94 | 0.008356352 |
| *SAMD14* | sterile alpha motif domain containing 14 | 0.94 | 0.010151475 |
| *ATP1A3* | ATPase Na+/K+ transporting subunit alpha 3 | 0.94 | 0.047614233 |
| *CCDC148* | coiled-coil domain containing 148 | 0.93 | 0.027762374 |
| *PPM1H* | protein phosphatase, Mg2+/Mn2+ dependent 1H | 0.93 | 0.00493619 |
| *PLEKHA7* | pleckstrin homology domain containing A7 | 0.93 | 0.0253494 |
| *PDE1C* | phosphodiesterase 1C | 0.93 | 0.035283159 |
| *RPS6KA1* | ribosomal protein S6 kinase A1 | 0.93 | 0.038776363 |
| *PHLDA1* | pleckstrin homology like domain family A member 1 | 0.93 | 0.015573203 |
| *ITIH5* | inter-alpha-trypsin inhibitor heavy chain 5 | 0.92 | 0.009681211 |
| *EVA1A* | eva-1 homolog A, regulator of programmed cell death | 0.92 | 0.012983106 |
| *RCAN1* | regulator of calcineurin 1 | 0.92 | 0.002048462 |
| *PCSK1* | proprotein convertase subtilisin/kexin type 1 | 0.92 | 0.026822353 |
| *TGM5* | transglutaminase 5 | 0.92 | 0.003476304 |
| *LINC00856* | long intergenic non-protein coding RNA 856 | 0.92 | 0.010151475 |
| *NA* | NA | 0.92 | 0.026215254 |
| *NXPH4* | neurexophilin 4 | 0.91 | 0.045314329 |
| *CNKSR2* | connector enhancer of kinase suppressor of Ras 2 | 0.90 | 0.041059956 |
| *SMYD2* | SET and MYND domain containing 2 | 0.89 | 0.018791317 |
| *TMEM131L* | transmembrane 131 like | 0.88 | 0.00245372 |
| *EGFLAM* | EGF like, fibronectin type III and laminin G domains | 0.88 | 0.03073498 |
| *HOMER2* | homer scaffold protein 2 | 0.88 | 0.012940255 |
| *STAT4* | signal transducer and activator of transcription 4 | 0.88 | 0.00569635 |
| *ZP3* | zona pellucida glycoprotein 3 | 0.87 | 0.013398037 |
| *NA* | NA | 0.87 | 0.001168463 |
| *SORCS2* | sortilin related VPS10 domain containing receptor 2 | 0.86 | 0.028518081 |
| *NR3C2* | nuclear receptor subfamily 3 group C member 2 | 0.85 | 0.0104071 |
| *MIR1915HG* | MIR1915 host gene | 0.85 | 0.007580509 |
| *LACC1* | laccase domain containing 1 | 0.85 | 0.002033882 |
| *SEL1L3* | SEL1L family member 3 | 0.85 | 0.011317739 |
| *NCS1* | neuronal calcium sensor 1 | 0.84 | 2.08E-07 |
| *ASS1* | argininosuccinate synthase 1 | 0.84 | 0.000202089 |
| *LOXL1-AS1* | LOXL1 antisense RNA 1 | 0.84 | 0.004689278 |
| *GXYLT2* | glucoside xylosyltransferase 2 | 0.84 | 0.002061228 |
| *L3MBTL2-AS1* | L3MBTL2 antisense RNA 1 | 0.83 | 0.017538044 |
| *WARS1* | tryptophanyl-tRNA synthetase 1 | 0.82 | 0.011745386 |
| *TUFT1* | tuftelin 1 | 0.82 | 0.002749693 |
| *MTHFD1L* | methylenetetrahydrofolate dehydrogenase (NADP+ dependent) 1 like | 0.80 | 0.026513345 |
| *CHN2* | chimerin 2 | 0.78 | 0.027106408 |
| *KIAA1549L* | KIAA1549 like | 0.78 | 0.000936344 |
| *MELTF-AS1* | MELTF antisense RNA 1 | 0.77 | 0.01576322 |
| *DAB2* | DAB adaptor protein 2 | 0.77 | 0.010969325 |
| *ATP8B1* | ATPase phospholipid transporting 8B1 | 0.76 | 0.004560314 |
| *ARNTL2* | aryl hydrocarbon receptor nuclear translocator like 2 | 0.76 | 0.017567259 |
| *E2F5* | E2F transcription factor 5 | 0.75 | 0.005678885 |
| *RNF122* | ring finger protein 122 | 0.75 | 0.001358663 |
| *GLIS2* | GLIS family zinc finger 2 | 0.75 | 7.79E-05 |
| *MOCOS* | molybdenum cofactor sulfurase | 0.75 | 0.001215003 |
| *ARID5A* | AT-rich interaction domain 5A | 0.75 | 0.027106408 |
| *GPR153* | G protein-coupled receptor 153 | 0.74 | 0.001215003 |
| *FNIP2* | folliculin interacting protein 2 | 0.74 | 0.023101885 |
| *MYOM1* | myomesin 1 | 0.74 | 0.020063543 |
| *RGS3* | regulator of G protein signaling 3 | 0.74 | 1.66E-05 |
| *ZNF280B* | zinc finger protein 280B | 0.73 | 0.02553804 |
| *SHB* | SH2 domain containing adaptor protein B | 0.73 | 0.001343943 |
| *GUCY1A2* | guanylate cyclase 1 soluble subunit alpha 2 | 0.73 | 0.036754041 |
| *PARD6A* | par-6 family cell polarity regulator alpha | 0.72 | 0.047614233 |
| *GTPBP2* | GTP binding protein 2 | 0.72 | 0.001037711 |
| *AMACR* | alpha-methylacyl-CoA racemase | 0.72 | 1.64E-05 |
| *SDSL* | serine dehydratase like | 0.71 | 0.00316593 |
| *GSDME* | gasdermin E | 0.71 | 0.011482877 |
| *SERP2* | stress associated endoplasmic reticulum protein family member 2 | 0.71 | 0.00636045 |
| *TPST2* | tyrosylprotein sulfotransferase 2 | 0.71 | 0.000806423 |
| *BCAS4* | breast carcinoma amplified sequence 4 | 0.71 | 0.043472176 |
| *RALGPS1* | Ral GEF with PH domain and SH3 binding motif 1 | 0.70 | 0.023156482 |
| *MYO1B* | myosin IB | 0.70 | 0.004591736 |
| *ANKRD34A* | ankyrin repeat domain 34A | 0.70 | 0.005817268 |
| *ZBTB16* | zinc finger and BTB domain containing 16 | -4.81 | 1.34E-117 |
| *HIF3A* | hypoxia inducible factor 3 subunit alpha | -3.01 | 3.30E-17 |
| *FKBP5* | FKBP prolyl isomerase 5 | -2.83 | 2.05E-25 |
| *TIMP4* | TIMP metallopeptidase inhibitor 4 | -2.52 | 2.61E-11 |
| *PER1* | period circadian regulator 1 | -2.37 | 3.39E-45 |
| *SLC16A12* | solute carrier family 16 member 12 | -2.33 | 3.54E-10 |
| *ABCC2* | ATP binding cassette subfamily C member 2 | -2.29 | 6.34E-10 |
| *LRP1B* | LDL receptor related protein 1B | -2.24 | 1.05E-08 |
| *ANGPTL8* | angiopoietin like 8 | -2.22 | 1.38E-08 |
| *SAA1* | serum amyloid A1 | -2.20 | 1.89E-08 |
| *PILRA* | paired immunoglobin like type 2 receptor alpha | -2.15 | 3.53E-10 |
| *MAOA* | monoamine oxidase A | -2.11 | 1.23E-10 |
| *C6* | complement C6 | -2.11 | 3.43E-08 |
| *INHBB* | inhibin subunit beta B | -2.05 | 3.71E-11 |
| *CYP4B1* | cytochrome P450 family 4 subfamily B member 1 | -1.97 | 7.02E-07 |
| *GALNT15* | polypeptide N-acetylgalactosaminyltransferase 15 | -1.89 | 1.88E-06 |
| *TMPRSS5* | transmembrane serine protease 5 | -1.88 | 3.19E-06 |
| *RAPGEF5* | Rap guanine nucleotide exchange factor 5 | -1.86 | 5.02E-06 |
| *TMC2* | transmembrane channel like 2 | -1.83 | 2.75E-06 |
| *NEGR1* | neuronal growth regulator 1 | -1.82 | 9.04E-22 |
| *MMP28* | matrix metallopeptidase 28 | -1.81 | 1.17E-06 |
| *FMO2* | flavin containing dimethylaniline monoxygenase 2 | -1.81 | 1.37E-06 |
| *CRISPLD2* | cysteine rich secretory protein LCCL domain containing 2 | -1.79 | 1.23E-10 |
| *LMO3* | LIM domain only 3 | -1.78 | 2.45E-08 |
| *GRIA1* | glutamate ionotropic receptor AMPA type subunit 1 | -1.75 | 7.60E-07 |
| *STC1* | stanniocalcin 1 | -1.74 | 1.29E-05 |
| *AVPR1A* | arginine vasopressin receptor 1A | -1.72 | 3.69E-05 |
| *CPM* | carboxypeptidase M | -1.72 | 1.50E-05 |
| *NA* | NA | -1.71 | 3.25E-05 |
| *RASL11A* | RAS like family 11 member A | -1.71 | 1.97E-08 |
| *ATP1A2* | ATPase Na+/K+ transporting subunit alpha 2 | -1.71 | 3.72E-05 |
| *PKD2L1* | polycystin 2 like 1, transient receptor potential cation channel | -1.70 | 5.25E-05 |
| *GPX3* | glutathione peroxidase 3 | -1.68 | 1.29E-05 |
| *KIAA0040* | KIAA0040 | -1.68 | 6.53E-05 |
| *IP6K3* | inositol hexakisphosphate kinase 3 | -1.66 | 8.72E-05 |
| *METTL7A* | methyltransferase like 7A | -1.66 | 9.37E-06 |
| *GLYAT* | glycine-N-acyltransferase | -1.66 | 8.95E-05 |
| *F5* | coagulation factor V | -1.65 | 9.41E-05 |
| *SYN2* | synapsin II | -1.64 | 0.000114669 |
| *ALS2CL* | ALS2 C-terminal like | -1.63 | 0.000100674 |
| *GGT5* | gamma-glutamyltransferase 5 | -1.61 | 5.30E-05 |
| *PRODH* | proline dehydrogenase 1 | -1.60 | 9.41E-05 |
| *ACSL6* | acyl-CoA synthetase long chain family member 6 | -1.58 | 0.00023662 |
| *PLCH1* | phospholipase C eta 1 | -1.57 | 0.000270556 |
| *GLUL* | glutamate-ammonia ligase | -1.56 | 2.74E-07 |
| *ARHGEF16* | Rho guanine nucleotide exchange factor 16 | -1.56 | 0.000301928 |
| *APCDD1* | APC down-regulated 1 | -1.54 | 5.25E-05 |
| *DPT* | dermatopontin | -1.54 | 4.52E-05 |
| *CLCN1* | chloride voltage-gated channel 1 | -1.53 | 0.000292718 |
| *SERPINA3* | serpin family A member 3 | -1.53 | 4.91E-05 |
| *MAP2K6* | mitogen-activated protein kinase kinase 6 | -1.52 | 0.000352204 |
| *RXFP1* | relaxin family peptide receptor 1 | -1.51 | 0.000229271 |
| *APOD* | apolipoprotein D | -1.49 | 0.000656841 |
| *FAM166B* | family with sequence similarity 166 member B | -1.49 | 0.000584654 |
| *ACKR2* | atypical chemokine receptor 2 | -1.48 | 5.91E-06 |
| *KCNK5* | potassium two pore domain channel subfamily K member 5 | -1.48 | 0.0006409 |
| *ANGPTL1* | angiopoietin like 1 | -1.47 | 3.46E-06 |
| *FGD4* | FYVE, RhoGEF and PH domain containing 4 | -1.47 | 4.52E-05 |
| *HS3ST2* | heparan sulfate-glucosamine 3-sulfotransferase 2 | -1.47 | 0.000806423 |
| *MGP* | matrix Gla protein | -1.46 | 0.000202089 |
| *TSC22D3* | TSC22 domain family member 3 | -1.45 | 6.17E-22 |
| *ADRA1B* | adrenoceptor alpha 1B | -1.45 | 5.88E-07 |
| *KDR* | kinase insert domain receptor | -1.45 | 0.001125985 |
| *LINC01088* | long intergenic non-protein coding RNA 1088 | -1.44 | 0.000306569 |
| *NA* | NA | -1.43 | 0.001332712 |
| *ALOX5AP* | arachidonate 5-lipoxygenase activating protein | -1.43 | 0.00083161 |
| *NKD2* | NKD inhibitor of WNT signaling pathway 2 | -1.42 | 0.001498731 |
| *DPEP1* | dipeptidase 1 | -1.42 | 0.001567438 |
| *CYP8B1* | cytochrome P450 family 8 subfamily B member 1 | -1.41 | 0.000215184 |
| *MRO* | maestro | -1.41 | 0.000821422 |
| *GSTA1* | glutathione S-transferase alpha 1 | -1.40 | 0.001800055 |
| *EPHB6* | EPH receptor B6 | -1.39 | 0.000593528 |
| *ZNF385B* | zinc finger protein 385B | -1.38 | 0.002168056 |
| *PTGS1* | prostaglandin-endoperoxide synthase 1 | -1.37 | 1.01E-06 |
| *ADH1A* | alcohol dehydrogenase 1A (class I), alpha polypeptide | -1.37 | 0.001111716 |
| *VIT* | vitrin | -1.37 | 0.00033432 |
| *CRLF1* | cytokine receptor like factor 1 | -1.36 | 8.29E-05 |
| *TENT5B* | terminal nucleotidyltransferase 5B | -1.36 | 4.18E-06 |
| *ACSM2A* | acyl-CoA synthetase medium chain family member 2A | -1.36 | 0.002809072 |
| *LOC285847* | uncharacterized LOC285847 | -1.36 | 0.001858037 |
| *GPM6B* | glycoprotein M6B | -1.36 | 3.25E-05 |
| *PLXNA4* | plexin A4 | -1.35 | 1.02E-06 |
| *LINC00482* | long intergenic non-protein coding RNA 482 | -1.35 | 0.000752396 |
| *GPC3* | glypican 3 | -1.35 | 0.003255676 |
| *GABRA5* | gamma-aminobutyric acid type A receptor subunit alpha5 | -1.35 | 0.003333887 |
| *DAAM2-AS1* | DAAM2 antisense RNA 1 | -1.34 | 0.000236189 |
| *NGFR* | nerve growth factor receptor | -1.32 | 0.002939022 |
| *RGCC* | regulator of cell cycle | -1.32 | 0.003036311 |
| *HPD* | 4-hydroxyphenylpyruvate dioxygenase | -1.31 | 0.002049237 |
| *ACSM2B* | acyl-CoA synthetase medium chain family member 2B | -1.31 | 0.004536672 |
| *MYEOV* | myeloma overexpressed | -1.30 | 0.004458824 |
| *MT1X* | metallothionein 1X | -1.30 | 7.93E-06 |
| *PTPN22* | protein tyrosine phosphatase non-receptor type 22 | -1.29 | 0.004907835 |
| *SLC34A2* | solute carrier family 34 member 2 | -1.28 | 0.006593828 |
| *ISM1* | isthmin 1 | -1.28 | 0.006226472 |
| *C2orf88* | chromosome 2 open reading frame 88 | -1.28 | 0.004347359 |
| *LEP* | leptin | -1.27 | 0.005234252 |
| *TTYH1* | tweety family member 1 | -1.27 | 0.005418178 |
| *SLA* | Src like adaptor | -1.27 | 0.007084364 |
| *CCN4* | cellular communication network factor 4 | -1.26 | 0.00560254 |
| *ADH1B* | alcohol dehydrogenase 1B (class I), beta polypeptide | -1.26 | 0.004045742 |
| *GPR88* | G protein-coupled receptor 88 | -1.26 | 0.006812536 |
| *RIPOR3* | RIPOR family member 3 | -1.25 | 0.007150537 |
| *HSPA6* | heat shock protein family A (Hsp70) member 6 | -1.25 | 0.008124626 |
| *AACS* | acetoacetyl-CoA synthetase | -1.24 | 0.001330104 |
| *ALKAL2* | ALK and LTK ligand 2 | -1.23 | 0.009692994 |
| *CST3* | cystatin C | -1.23 | 1.98E-05 |
| *SLPI* | secretory leukocyte peptidase inhibitor | -1.21 | 0.001879762 |
| *LRRN3* | leucine rich repeat neuronal 3 | -1.21 | 0.008058827 |
| *C2orf72* | chromosome 2 open reading frame 72 | -1.21 | 0.012130134 |
| *HSPA7* | heat shock protein family A (Hsp70) member 7 (pseudogene) | -1.21 | 0.007617462 |
| *OLFM2* | olfactomedin 2 | -1.20 | 0.000806423 |
| *ABLIM3* | actin binding LIM protein family member 3 | -1.20 | 0.001498731 |
| *ALDOC* | aldolase, fructose-bisphosphate C | -1.20 | 0.010233425 |
| *RASSF4* | Ras association domain family member 4 | -1.19 | 0.00020977 |
| *CTHRC1* | collagen triple helix repeat containing 1 | -1.19 | 0.001266085 |
| *POU3F3* | POU class 3 homeobox 3 | -1.18 | 0.011317739 |
| *DNASE1L3* | deoxyribonuclease 1 like 3 | -1.18 | 0.008730918 |
| *TRPV6* | transient receptor potential cation channel subfamily V member 6 | -1.18 | 0.015573203 |
| *SLC4A11* | solute carrier family 4 member 11 | -1.18 | 0.006033697 |
| *PIK3R1* | phosphoinositide-3-kinase regulatory subunit 1 | -1.17 | 0.002344534 |
| *TMEM150C* | transmembrane protein 150C | -1.17 | 0.002738517 |
| *AGTR1* | angiotensin II receptor type 1 | -1.17 | 0.011985927 |
| *PRRT4* | proline rich transmembrane protein 4 | -1.16 | 0.017744288 |
| *DUSP4* | dual specificity phosphatase 4 | -1.16 | 0.006876331 |
| *TRIM16L* | tripartite motif containing 16 like | -1.16 | 0.005161367 |
| *SLC2A13* | solute carrier family 2 member 13 | -1.15 | 0.003690124 |
| *MAPK4* | mitogen-activated protein kinase 4 | -1.15 | 0.020485089 |
| *LINC01554* | long intergenic non-protein coding RNA 1554 | -1.15 | 0.012289729 |
| *TRARG1* | trafficking regulator of GLUT4 (SLC2A4) 1 | -1.14 | 0.020340131 |
| *KLF9* | Kruppel like factor 9 | -1.14 | 5.37E-10 |
| *RGMA* | repulsive guidance molecule BMP co-receptor a | -1.14 | 1.02E-06 |
| *BOC* | BOC cell adhesion associated, oncogene regulated | -1.13 | 0.000208859 |
| *ZBED3-AS1* | ZBED3 antisense RNA 1 | -1.12 | 0.018125851 |
| *EYA2* | EYA transcriptional coactivator and phosphatase 2 | -1.12 | 0.013696386 |
| *AFAP1L1* | actin filament associated protein 1 like 1 | -1.12 | 0.018334162 |
| *FAM107A* | family with sequence similarity 107 member A | -1.12 | 0.026513345 |
| *TWF2* | twinfilin actin binding protein 2 | -1.11 | 0.003377255 |
| *OMD* | osteomodulin | -1.11 | 0.019915143 |
| *VAV3* | vav guanine nucleotide exchange factor 3 | -1.11 | 0.026184562 |
| *GDF7* | growth differentiation factor 7 | -1.11 | 0.0253494 |
| *TC2N* | tandem C2 domains, nuclear | -1.11 | 0.005418178 |
| *CUTC* | cutC copper transporter | -1.11 | 4.76E-14 |
| *TPRG1* | tumor protein p63 regulated 1 | -1.11 | 0.010821996 |
| *P2RY14* | purinergic receptor P2Y14 | -1.11 | 0.028057773 |
| *ANGPTL5* | angiopoietin like 5 | -1.11 | 0.020881077 |
| *NPTX1* | neuronal pentraxin 1 | -1.11 | 0.028586024 |
| *NA* | NA | -1.10 | 0.009499846 |
| *POM121L9P* | POM121 transmembrane nucleoporin like 9, pseudogene | -1.10 | 0.018281172 |
| *WNT5A* | Wnt family member 5A | -1.09 | 0.005683595 |
| *GNG2* | G protein subunit gamma 2 | -1.08 | 0.023417525 |
| *CLDN7* | claudin 7 | -1.08 | 0.014401277 |
| *CFD* | complement factor D | -1.08 | 0.000359467 |
| *TNFSF10* | TNF superfamily member 10 | -1.07 | 0.020881077 |
| *ERRFI1* | ERBB receptor feedback inhibitor 1 | -1.07 | 3.49E-06 |
| *SMCO3* | single-pass membrane protein with coiled-coil domains 3 | -1.07 | 0.021325691 |
| *NA* | NA | -1.06 | 0.039010781 |
| *KCTD14* | potassium channel tetramerization domain containing 14 | -1.05 | 0.025245361 |
| *P2RY12* | purinergic receptor P2Y12 | -1.05 | 0.041059956 |
| *GDF10* | growth differentiation factor 10 | -1.05 | 0.029701377 |
| *CSRNP3* | cysteine and serine rich nuclear protein 3 | -1.05 | 0.005351338 |
| *MEOX1* | mesenchyme homeobox 1 | -1.04 | 0.047614233 |
| *DHRS3* | dehydrogenase/reductase 3 | -1.04 | 0.000107485 |
| *AZGP1* | alpha-2-glycoprotein 1, zinc-binding | -1.04 | 0.046154705 |
| *SCUBE1* | signal peptide, CUB domain and EGF like domain containing 1 | -1.04 | 0.048268887 |
| *TF* | transferrin | -1.04 | 0.040204145 |
| *C7* | complement C7 | -1.04 | 0.041428808 |
| *C1QTNF7* | C1q and TNF related 7 | -1.03 | 0.003415192 |
| *CACNB2* | calcium voltage-gated channel auxiliary subunit beta 2 | -1.03 | 0.002505476 |
| *SSH2* | slingshot protein phosphatase 2 | -1.02 | 0.000806423 |
| *ZNF395* | zinc finger protein 395 | -1.02 | 9.78E-09 |
| *EDN1* | endothelin 1 | -1.02 | 0.038653991 |
| *PLEKHH1* | pleckstrin homology, MyTH4 and FERM domain containing H1 | -1.02 | 0.044715424 |
| *NA* | NA | -1.02 | 0.044715424 |
| *GPR158* | G protein-coupled receptor 158 | -1.02 | 0.047205566 |
| *RETREG1* | reticulophagy regulator 1 | -1.01 | 0.030359313 |
| *ANKEF1* | ankyrin repeat and EF-hand domain containing 1 | -1.01 | 0.049854652 |
| *TRNP1* | TMF1 regulated nuclear protein 1 | -1.01 | 0.00255633 |
| *CYP4F22* | cytochrome P450 family 4 subfamily F member 22 | -1.00 | 0.037007094 |
| *HSD17B13* | hydroxysteroid 17-beta dehydrogenase 13 | -1.00 | 0.044705798 |
| *SYNE2* | spectrin repeat containing nuclear envelope protein 2 | -1.00 | 0.023156482 |
| *OLAH* | oleoyl-ACP hydrolase | -1.00 | 0.029149252 |
| *TG* | thyroglobulin | -1.00 | 0.008722934 |
| *WASF3* | WASP family member 3 | -0.99 | 2.89E-07 |
| *NES* | nestin | -0.99 | 0.043040684 |
| *CORO6* | coronin 6 | -0.99 | 0.000191454 |
| *SAMHD1* | SAM and HD domain containing deoxynucleoside triphosphate triphosphohydrolase 1 | -0.99 | 0.027410528 |
| *WNT11* | Wnt family member 11 | -0.99 | 0.029701377 |
| *PPARG* | peroxisome proliferator activated receptor gamma | -0.98 | 0.040510561 |
| *SLC25A10* | solute carrier family 25 member 10 | -0.98 | 0.033690709 |
| *ICOSLG* | inducible T cell costimulator ligand | -0.98 | 0.002446536 |
| *SMARCD2* | SWI/SNF related, matrix associated, actin dependent regulator of chromatin, subfamily d, member 2 | -0.97 | 2.37E-11 |
| *CTSC* | cathepsin C | -0.96 | 0.012045884 |
| *TUBA8* | tubulin alpha 8 | -0.96 | 0.000438903 |
| *ABCA6* | ATP binding cassette subfamily A member 6 | -0.96 | 0.022413814 |
| *MYCL* | MYCL proto-oncogene, bHLH transcription factor | -0.95 | 0.039950059 |
| *NRCAM* | neuronal cell adhesion molecule | -0.95 | 0.023054091 |
| *STK17B* | serine/threonine kinase 17b | -0.95 | 0.011728543 |
| *GPSM2* | G protein signaling modulator 2 | -0.94 | 0.01272634 |
| *RNASE4* | ribonuclease A family member 4 | -0.94 | 0.000344928 |
| *AOX1* | aldehyde oxidase 1 | -0.94 | 0.009434382 |
| *SPARCL1* | SPARC like 1 | -0.94 | 0.026208715 |
| *LAMA2* | laminin subunit alpha 2 | -0.93 | 0.000662436 |
| *RGS22* | regulator of G protein signaling 22 | -0.93 | 0.015666196 |
| *PHKG1* | phosphorylase kinase catalytic subunit gamma 1 | -0.93 | 0.030359313 |
| *TMEM64* | transmembrane protein 64 | -0.93 | 0.007339432 |
| *ANPEP* | alanyl aminopeptidase, membrane | -0.92 | 0.006783376 |
| *GPATCH11* | G-patch domain containing 11 | -0.92 | 0.036209226 |
| *CDKN1C* | cyclin dependent kinase inhibitor 1C | -0.91 | 0.002000403 |
| *HLX* | H2.0 like homeobox | -0.91 | 4.18E-06 |
| *NEXN* | nexilin F-actin binding protein | -0.89 | 0.011744388 |
| *TGFBR2* | transforming growth factor beta receptor 2 | -0.89 | 2.06E-07 |
| *FMN1* | formin 1 | -0.87 | 0.00839677 |
| *SOX13* | SRY-box transcription factor 13 | -0.87 | 6.66E-06 |
| *IRS1* | insulin receptor substrate 1 | -0.86 | 0.006812536 |
| *ELANE* | elastase, neutrophil expressed | -0.85 | 0.022442794 |
| *SMOC2* | SPARC related modular calcium binding 2 | -0.84 | 0.023365789 |
| *NID1* | nidogen 1 | -0.84 | 0.002123405 |
| *GREB1L* | GREB1 like retinoic acid receptor coactivator | -0.83 | 0.028586024 |
| *PLPP3* | phospholipid phosphatase 3 | -0.83 | 0.024461597 |
| *JADE2* | jade family PHD finger 2 | -0.82 | 0.002505476 |
| *HNMT* | histamine N-methyltransferase | -0.82 | 0.012360534 |
| *NA* | NA | -0.82 | 0.025698089 |
| *ALDH16A1* | aldehyde dehydrogenase 16 family member A1 | -0.81 | 0.00164913 |
| *IQCH-AS1* | IQCH antisense RNA 1 | -0.81 | 0.006859063 |
| *TNS2* | tensin 2 | -0.81 | 0.003834459 |
| *SLC4A4* | solute carrier family 4 member 4 | -0.81 | 0.047220525 |
| *ANG* | angiogenin | -0.80 | 0.000760663 |
| *NAV2* | neuron navigator 2 | -0.80 | 0.00759564 |
| *TACC1* | transforming acidic coiled-coil containing protein 1 | -0.79 | 5.52E-05 |
| *ADARB1* | adenosine deaminase RNA specific B1 | -0.79 | 0.037699346 |
| *ZNF438* | zinc finger protein 438 | -0.78 | 0.008116872 |
| *LRP4* | LDL receptor related protein 4 | -0.78 | 0.005584825 |
| *TTPAL* | alpha tocopherol transfer protein like | -0.77 | 0.000203943 |
| *LINC00472* | long intergenic non-protein coding RNA 472 | -0.77 | 0.049634866 |
| *LINC01960* | long intergenic non-protein coding RNA 1960 | -0.76 | 0.047614233 |
| *EVA1C* | eva-1 homolog C | -0.76 | 0.041059956 |
| *APOL3* | apolipoprotein L3 | -0.75 | 0.0104071 |
| *TNFAIP8L3* | TNF alpha induced protein 8 like 3 | -0.75 | 0.029107382 |
| *GAS6* | growth arrest specific 6 | -0.75 | 0.005021214 |
| *IL17RE* | interleukin 17 receptor E | -0.75 | 0.043273779 |
| *CHST2* | carbohydrate sulfotransferase 2 | -0.74 | 0.003690124 |
| *PDGFRA* | platelet derived growth factor receptor alpha | -0.74 | 0.002219599 |
| *DIAPH2* | diaphanous related formin 2 | -0.73 | 0.026215254 |
| *BMPR1B* | bone morphogenetic protein receptor type 1B | -0.73 | 0.018281172 |
| *TCEAL4* | transcription elongation factor A like 4 | -0.71 | 0.009681211 |
| *ZHX3* | zinc fingers and homeoboxes 3 | -0.71 | 3.11E-05 |
| *ZBED3* | zinc finger BED-type containing 3 | -0.71 | 0.041059956 |

**Supplementary Table 4.** DEGs from comparison of active beige and inactive beige adipocytes; n=8

| **Symbol** | **Gene Name** | **Log2 Fold Change** | **Adj. P value** |
| --- | --- | --- | --- |
| *SLC22A12* | solute carrier family 22 member 12 | 1.75 | 5.79E-07 |
| *KRT79* | keratin 79 | 1.69 | 1.40E-06 |
| *PM20D1* | peptidase M20 domain containing 1 | 1.67 | 2.16E-06 |
| *CPA4* | carboxypeptidase A4 | 1.63 | 3.35E-06 |
| *FNDC1* | fibronectin type III domain containing 1 | 1.56 | 3.95E-06 |
| *SCN4A* | sodium voltage-gated channel alpha subunit 4 | 1.56 | 1.70E-05 |
| *AQP3* | aquaporin 3 (Gill blood group) | 1.53 | 5.03E-06 |
| *TENT5C* | terminal nucleotidyltransferase 5C | 1.52 | 1.04E-06 |
| *PCK1* | phosphoenolpyruvate carboxykinase 1 | 1.50 | 3.20E-05 |
| *C1QTNF3* | C1q and TNF related 3 | 1.49 | 1.90E-05 |
| *CD96* | CD96 molecule | 1.47 | 5.81363E-05 |
| *LINC02554* | long intergenic non-protein coding RNA 2554 | 1.47 | 6.38E-05 |
| *C3orf80* | chromosome 3 open reading frame 80 | 1.47 | 1.13E-05 |
| *NA* | NA | 1.46 | 5.29225E-05 |
| *MAP3K7CL* | MAP3K7 C-terminal like | 1.46 | 1.08E-10 |
| *CD52* | CD52 molecule | 1.44 | 9.25E-05 |
| *CLDN2* | claudin 2 | 1.43 | 1.23E-04 |
| *IL1B* | interleukin 1 beta | 1.43 | 4.29E-05 |
| *ADAMTS18* | ADAM metallopeptidase with thrombospondin type 1 motif 18 | 1.42 | 0.000153681 |
| *FCN1* | ficolin 1 | 1.41 | 1.68E-04 |
| *KCNK12* | potassium two pore domain channel subfamily K member 12 | 1.37 | 2.63E-04 |
| *LRRC15* | leucine rich repeat containing 15 | 1.37 | 3.00E-04 |
| *KCNA1* | potassium voltage-gated channel subfamily A member 1 | 1.37 | 7.44808E-05 |
| *SORL1* | sortilin related receptor 1 | 1.36 | 0.000261364 |
| *MYL4* | myosin light chain 4 | 1.34 | 0.000337071 |
| *GK* | glycerol kinase | 1.32 | 1.41E-06 |
| *PPP1R14C* | protein phosphatase 1 regulatory inhibitor subunit 14C | 1.31 | 6.28E-04 |
| *CITED1* | Cbp/p300 interacting transactivator with Glu/Asp rich carboxy-terminal domain 1 | 1.31 | 0.000200952 |
| *BBOX1* | gamma-butyrobetaine hydroxylase 1 | 1.31 | 0.000662964 |
| *THBD* | thrombomodulin | 1.30 | 1.24E-04 |
| *CTXN1* | cortexin 1 | 1.29 | 1.31E-05 |
| *ADGRG1* | adhesion G protein-coupled receptor G1 | 1.26 | 5.29E-05 |
| *ADAMTS14* | ADAM metallopeptidase with thrombospondin type 1 motif 14 | 1.21 | 5.66E-04 |
| *SLC22A3* | solute carrier family 22 member 3 | 1.21 | 6.26E-05 |
| *PLIN5* | perilipin 5 | 1.20 | 0.00124726 |
| *LOC100506253* | uncharacterized LOC100506253 | 1.18 | 3.39E-03 |
| *RTKN2* | rhotekin 2 | 1.17 | 5.71453E-05 |
| *ACSM3* | acyl-CoA synthetase medium chain family member 3 | 1.17 | 0.00066074 |
| *KCNK15* | potassium two pore domain channel subfamily K member 15 | 1.17 | 1.24E-03 |
| *NA* | NA | 1.17 | 0.003957437 |
| *ECSCR* | endothelial cell surface expressed chemotaxis and apoptosis regulator | 1.16 | 0.003939119 |
| *SLCO2A1* | solute carrier organic anion transporter family member 2A1 | 1.16 | 0.002584458 |
| *CKMT1B* | creatine kinase, mitochondrial 1B | 1.14 | 0.003461073 |
| *LUCAT1* | lung cancer associated transcript 1 | 1.13 | 0.004170862 |
| *GAP43* | growth associated protein 43 | 1.13 | 0.005590778 |
| *RUBCNL* | rubicon like autophagy enhancer | 1.12 | 0.000928559 |
| *RFPL4B* | ret finger protein like 4B | 1.12 | 0.00566713 |
| *MEST* | mesoderm specific transcript | 1.11 | 6.38327E-05 |
| *E2F7* | E2F transcription factor 7 | 1.11 | 3.81167E-05 |
| *CPA2* | carboxypeptidase A2 | 1.11 | 0.007646033 |
| *SCAMP5* | secretory carrier membrane protein 5 | 1.10 | 0.000445285 |
| *RSPO3* | R-spondin 3 | 1.10 | 0.006858304 |
| *CIDEA* | cell death inducing DFFA like effector a | 1.09 | 0.008738219 |
| *ADAM12* | ADAM metallopeptidase domain 12 | 1.09 | 0.001696744 |
| *SELPLG* | selectin P ligand | 1.08 | 7.39E-05 |
| *SLC7A10* | solute carrier family 7 member 10 | 1.08 | 0.009565079 |
| *CIART* | circadian associated repressor of transcription | 1.08 | 2.43E-08 |
| *EPB41L4B* | erythrocyte membrane protein band 4.1 like 4B | 1.08 | 0.000915872 |
| *ADAMTS16* | ADAM metallopeptidase with thrombospondin type 1 motif 16 | 1.08 | 0.007957327 |
| *AATBC* | apoptosis associated transcript in bladder cancer | 1.07 | 0.010616214 |
| *LAMP3* | lysosomal associated membrane protein 3 | 1.06 | 0.012656697 |
| *PPP1R1A* | protein phosphatase 1 regulatory inhibitor subunit 1A | 1.06 | 0.011764285 |
| *FABP4* | fatty acid binding protein 4 | 1.05 | 0.010889907 |
| *TSHR* | thyroid stimulating hormone receptor | 1.05 | 0.012640386 |
| *RPS6KA1* | ribosomal protein S6 kinase A1 | 1.04 | 0.00720311 |
| *CKMT1A* | creatine kinase, mitochondrial 1A | 1.04 | 0.01438844 |
| *LAMC3* | laminin subunit gamma 3 | 1.04 | 0.010130293 |
| *PHLDA1* | pleckstrin homology like domain family A member 1 | 1.02 | 0.004202125 |
| *TRPM8* | transient receptor potential cation channel subfamily M member 8 | 1.01 | 0.019770198 |
| *RPLP0P2* | ribosomal protein lateral stalk subunit P0 pseudogene 2 | 1.01 | 0.003176049 |
| *KIRREL3* | kirre like nephrin family adhesion molecule 3 | 1.01 | 0.018804338 |
| *DPYSL3* | dihydropyrimidinase like 3 | 1.00 | 0.002259103 |
| *OPRK1* | opioid receptor kappa 1 | 0.99 | 0.020054477 |
| *PRG4* | proteoglycan 4 | 0.99 | 0.011534645 |
| *DLX3* | distal-less homeobox 3 | 0.99 | 0.022254759 |
| *FER1L6* | fer-1 like family member 6 | 0.99 | 0.025850071 |
| *NUDT14* | nudix hydrolase 14 | 0.99 | 1.14E-07 |
| *ICA1* | islet cell autoantigen 1 | 0.99 | 0.009355549 |
| *SH3GL3* | SH3 domain containing GRB2 like 3, endophilin A3 | 0.99 | 0.025960556 |
| *CEMIP* | cell migration inducing hyaluronidase 1 | 0.99 | 0.008061658 |
| *RIMS4* | regulating synaptic membrane exocytosis 4 | 0.96 | 2.31E-02 |
| *ZNF365* | zinc finger protein 365 | 0.96 | 0.012640386 |
| *DOK5* | docking protein 5 | 0.96 | 6.72E-12 |
| *IL13RA2* | interleukin 13 receptor subunit alpha 2 | 0.96 | 0.03383346 |
| *CYP4F12* | cytochrome P450 family 4 subfamily F member 12 | 0.96 | 0.030761867 |
| *PDE1B* | phosphodiesterase 1B | 0.95 | 0.032617469 |
| *PALD1* | phosphatase domain containing paladin 1 | 0.95 | 0.028348773 |
| *CH25H* | cholesterol 25-hydroxylase | 0.95 | 0.030970829 |
| *LMO2* | LIM domain only 2 | 0.95 | 0.000818633 |
| *MYOM3* | myomesin 3 | 0.95 | 0.03593656 |
| *INA* | internexin neuronal intermediate filament protein alpha | 0.95 | 0.027731101 |
| *TMEM63C* | transmembrane protein 63C | 0.94 | 0.037583312 |
| *VAT1L* | vesicle amine transport 1 like | 0.94 | 3.89E-02 |
| *TMEM132C* | transmembrane protein 132C | 0.94 | 0.035016534 |
| *CSRP2* | cysteine and glycine rich protein 2 | 0.94 | 0.018804338 |
| *LHCGR* | luteinizing hormone/choriogonadotropin receptor | 0.94 | 0.040842846 |
| *INPP5J* | inositol polyphosphate-5-phosphatase J | 0.93 | 3.29E-02 |
| *COBL* | cordon-bleu WH2 repeat protein | 0.93 | 0.044827867 |
| *EVA1A* | eva-1 homolog A, regulator of programmed cell death | 0.93 | 0.019781645 |
| *FAM151A* | family with sequence similarity 151 member A | 0.92 | 0.046370483 |
| *SSC5D* | scavenger receptor cysteine rich family member with 5 domains | 0.92 | 0.002407721 |
| *SLC24A2* | solute carrier family 24 member 2 | 0.92 | 4.13E-02 |
| *STX11* | syntaxin 11 | 0.91 | 9.28E-04 |
| *EPHB2* | EPH receptor B2 | 0.91 | 0.002996158 |
| *CYS1* | cystin 1 | 0.91 | 1.25E-03 |
| *DIRAS1* | DIRAS family GTPase 1 | 0.90 | 0.006008681 |
| *DIRC3* | disrupted in renal carcinoma 3 | 0.90 | 0.041835677 |
| *PPP2R2C* | protein phosphatase 2 regulatory subunit Bgamma | 0.90 | 0.028348773 |
| *LGI2* | leucine rich repeat LGI family member 2 | 0.89 | 0.042654121 |
| *ARC* | activity regulated cytoskeleton associated protein | 0.89 | 0.032056619 |
| *AP3B2* | adaptor related protein complex 3 subunit beta 2 | 0.89 | 0.047838824 |
| *LOC100507006* | uncharacterized LOC100507006 | 0.88 | 0.040407218 |
| *RHPN1* | rhophilin Rho GTPase binding protein 1 | 0.88 | 0.046271955 |
| *ABCA3* | ATP binding cassette subfamily A member 3 | 0.86 | 0.013166092 |
| *PLXDC1* | plexin domain containing 1 | 0.86 | 0.011636014 |
| *GXYLT2* | glucoside xylosyltransferase 2 | 0.85 | 0.002284371 |
| *SALL4* | spalt like transcription factor 4 | 0.85 | 0.032617469 |
| *TUBB3* | tubulin beta 3 class III | 0.84 | 0.008271003 |
| *ABCG1* | ATP binding cassette subfamily G member 1 | 0.84 | 0.017863114 |
| *LIF* | LIF interleukin 6 family cytokine | 0.82 | 0.012448106 |
| *SEL1L3* | SEL1L family member 3 | 0.82 | 0.026742566 |
| *PER3* | period circadian regulator 3 | 0.81 | 0.006539207 |
| *EGFLAM* | EGF like, fibronectin type III and laminin G domains | 0.81 | 0.027873852 |
| *ADGRB2* | adhesion G protein-coupled receptor B2 | 0.81 | 0.016609283 |
| *ASPHD2* | aspartate beta-hydroxylase domain containing 2 | 0.81 | 0.003141574 |
| *EPHA2* | EPH receptor A2 | 0.80 | 0.032617469 |
| *LTC4S* | leukotriene C4 synthase | 0.80 | 0.040842846 |
| *LACC1* | laccase domain containing 1 | 0.80 | 0.00175865 |
| *RBM24* | RNA binding motif protein 24 | 0.80 | 0.041264278 |
| *PLEKHA7* | pleckstrin homology domain containing A7 | 0.80 | 0.041264278 |
| *RGL3* | ral guanine nucleotide dissociation stimulator like 3 | 0.79 | 0.048585751 |
| *DUSP8* | dual specificity phosphatase 8 | 0.79 | 0.007515436 |
| *TDRKH* | tudor and KH domain containing | 0.78 | 0.003107981 |
| *EPB41* | erythrocyte membrane protein band 4.1 | 0.78 | 0.004170862 |
| *GPC1* | glypican 1 | 0.78 | 0.002463807 |
| *FUCA1* | alpha-L-fucosidase 1 | 0.77 | 0.000696625 |
| *CAMKK1* | calcium/calmodulin dependent protein kinase kinase 1 | 0.77 | 0.006354175 |
| *HOMER2* | homer scaffold protein 2 | 0.76 | 0.019363023 |
| *LUM* | lumican | 0.76 | 0.004412096 |
| *ASS1* | argininosuccinate synthase 1 | 0.75 | 0.001070742 |
| *TGM5* | transglutaminase 5 | 0.74 | 0.028464297 |
| *KIAA1549L* | KIAA1549 like | 0.74 | 0.000270804 |
| *PLAU* | plasminogen activator, urokinase | 0.73 | 0.001151066 |
| *AKR1B1* | aldo-keto reductase family 1 member B | 0.71 | 0.018470855 |
| *ARNTL2* | aryl hydrocarbon receptor nuclear translocator like 2 | 0.71 | 0.026616037 |
| *STARD10* | StAR related lipid transfer domain containing 10 | 0.70 | 0.013173834 |
| *ZBTB16* | zinc finger and BTB domain containing 16 | -4.55 | 7.5279E-135 |
| *HIF3A* | hypoxia inducible factor 3 subunit alpha | -2.80 | 6.48078E-20 |
| *FKBP5* | FKBP prolyl isomerase 5 | -2.63 | 7.43547E-36 |
| *PER1* | period circadian regulator 1 | -2.48 | 1.05052E-66 |
| *PILRA* | paired immunoglobin like type 2 receptor alpha | -2.41 | 7.9946E-20 |
| *INHBB* | inhibin subunit beta B | -2.04 | 1.0022E-16 |
| *MAOA* | monoamine oxidase A | -1.96 | 6.13575E-15 |
| *TIMP4* | TIMP metallopeptidase inhibitor 4 | -1.94 | 6.0412E-09 |
| *CRISPLD2* | cysteine rich secretory protein LCCL domain containing 2 | -1.90 | 3.8403E-17 |
| *SLC16A12* | solute carrier family 16 member 12 | -1.90 | 2.56274E-08 |
| *NEGR1* | neuronal growth regulator 1 | -1.86 | 3.01063E-22 |
| *GGT5* | gamma-glutamyltransferase 5 | -1.85 | 4.76338E-09 |
| *RAPGEF5* | Rap guanine nucleotide exchange factor 5 | -1.82 | 1.43402E-07 |
| *ACKR2* | atypical chemokine receptor 2 | -1.77 | 2.67498E-12 |
| *ABCC2* | ATP binding cassette subfamily C member 2 | -1.76 | 2.06239E-07 |
| *LMO3* | LIM domain only 3 | -1.76 | 5.50293E-12 |
| *RASL11A* | RAS like family 11 member A | -1.76 | 5.53268E-13 |
| *NA* | NA | -1.74 | 5.92002E-07 |
| *PRODH* | proline dehydrogenase 1 | -1.72 | 4.50E-07 |
| *TMC2* | transmembrane channel like 2 | -1.68 | 2.41386E-07 |
| *GALNT15* | polypeptide N-acetylgalactosaminyltransferase 15 | -1.67 | 1.91091E-06 |
| *GRIA1* | glutamate ionotropic receptor AMPA type subunit 1 | -1.65 | 7.5525E-07 |
| *CYP4B1* | cytochrome P450 family 4 subfamily B member 1 | -1.65 | 1.41023E-06 |
| *C6* | complement C6 | -1.64 | 3.84958E-06 |
| *DPEP1* | dipeptidase 1 | -1.64 | 3.95E-06 |
| *LRP1B* | LDL receptor related protein 1B | -1.63 | 3.84958E-06 |
| *CYP8B1* | cytochrome P450 family 8 subfamily B member 1 | -1.63 | 3.16197E-08 |
| *FMO2* | flavin containing dimethylaniline monoxygenase 2 | -1.59 | 1.25734E-06 |
| *PLXNA4* | plexin A4 | -1.54 | 4.73626E-11 |
| *ADRA1B* | adrenoceptor alpha 1B | -1.51 | 2.70604E-07 |
| *ANGPTL1* | angiopoietin like 1 | -1.50 | 1.31348E-11 |
| *DPT* | dermatopontin | -1.50 | 2.97073E-06 |
| *STC1* | stanniocalcin 1 | -1.47 | 5.10E-05 |
| *MGP* | matrix Gla protein | -1.46 | 2.07477E-05 |
| *CRLF1* | cytokine receptor like factor 1 | -1.44 | 1.50582E-08 |
| *TENT5B* | terminal nucleotidyltransferase 5B | -1.43 | 1.02619E-07 |
| *ANGPTL8* | angiopoietin like 8 | -1.42 | 1.15E-04 |
| *F5* | coagulation factor V | -1.41 | 1.63E-04 |
| *TSC22D3* | TSC22 domain family member 3 | -1.40 | 4.10922E-25 |
| *GABRA5* | gamma-aminobutyric acid type A receptor subunit alpha5 | -1.40 | 1.68E-04 |
| *LOC285847* | uncharacterized LOC285847 | -1.40 | 1.23E-04 |
| *GPX3* | glutathione peroxidase 3 | -1.40 | 1.75E-04 |
| *LEP* | leptin | -1.40 | 1.75E-04 |
| *AVPR1A* | arginine vasopressin receptor 1A | -1.36 | 3.37E-04 |
| *SAA1* | serum amyloid A1 | -1.35 | 1.57E-04 |
| *CPM* | carboxypeptidase M | -1.35 | 2.60E-04 |
| *MMP28* | matrix metallopeptidase 28 | -1.34 | 1.23E-04 |
| *KIAA0040* | KIAA0040 | -1.34 | 3.50E-04 |
| *POM121L9P* | POM121 transmembrane nucleoporin like 9, pseudogene | -1.34 | 1.49E-04 |
| *FGD4* | FYVE, RhoGEF and PH domain containing 4 | -1.33 | 1.07333E-05 |
| *ALOX5AP* | arachidonate 5-lipoxygenase activating protein | -1.31 | 6.15E-04 |
| *GLUL* | glutamate-ammonia ligase | -1.30 | 4.42008E-07 |
| *RGCC* | regulator of cell cycle | -1.27 | 0.000915872 |
| *WNT5A* | Wnt family member 5A | -1.27 | 5.74E-05 |
| *EPHB6* | EPH receptor B6 | -1.27 | 4.32E-04 |
| *SLA* | Src like adaptor | -1.26 | 1.12E-03 |
| *CCN4* | cellular communication network factor 4 | -1.26 | 9.98E-04 |
| *LRRN3* | leucine rich repeat neuronal 3 | -1.26 | 8.26E-04 |
| *HPD* | 4-hydroxyphenylpyruvate dioxygenase | -1.24 | 0.000893404 |
| *SYN2* | synapsin II | -1.23 | 1.58E-03 |
| *CLCN1* | chloride voltage-gated channel 1 | -1.23 | 1.51E-03 |
| *SLPI* | secretory leukocyte peptidase inhibitor | -1.23 | 0.001085974 |
| *VIT* | vitrin | -1.23 | 3.01E-04 |
| *METTL7A* | methyltransferase like 7A | -1.21 | 0.000737103 |
| *PTGS1* | prostaglandin-endoperoxide synthase 1 | -1.21 | 4.26491E-07 |
| *APCDD1* | APC down-regulated 1 | -1.21 | 0.00124726 |
| *KLF9* | Kruppel like factor 9 | -1.20 | 4.70306E-23 |
| *TMPRSS5* | transmembrane serine protease 5 | -1.19 | 0.00308391 |
| *ART4* | ADP-ribosyltransferase 4 (inactive) (Dombrock blood group) | -1.17 | 0.003269535 |
| *GPM6B* | glycoprotein M6B | -1.17 | 8.75E-04 |
| *ERRFI1* | ERBB receptor feedback inhibitor 1 | -1.16 | 8.19E-09 |
| *SMCO3* | single-pass membrane protein with coiled-coil domains 3 | -1.15 | 0.001962714 |
| *PKD2L1* | polycystin 2 like 1, transient receptor potential cation channel | -1.15 | 0.004170862 |
| *ALKAL2* | ALK and LTK ligand 2 | -1.14 | 0.005150176 |
| *PIK3R1* | phosphoinositide-3-kinase regulatory subunit 1 | -1.13 | 5.24E-04 |
| *LINC01088* | long intergenic non-protein coding RNA 1088 | -1.12 | 0.006055842 |
| *APOD* | apolipoprotein D | -1.12 | 0.006846304 |
| *TG* | thyroglobulin | -1.12 | 0.000915872 |
| *TC2N* | tandem C2 domains, nuclear | -1.12 | 1.16E-03 |
| *SPARCL1* | SPARC like 1 | -1.11 | 0.007330778 |
| *RGMA* | repulsive guidance molecule BMP co-receptor a | -1.11 | 1.15509E-12 |
| *OMD* | osteomodulin | -1.11 | 0.004922461 |
| *C1QTNF7* | C1q and TNF related 7 | -1.10 | 0.000915872 |
| *TRNP1* | TMF1 regulated nuclear protein 1 | -1.10 | 6.58E-05 |
| *ATP1A2* | ATPase Na+/K+ transporting subunit alpha 2 | -1.10 | 0.005072343 |
| *CDKN1C* | cyclin dependent kinase inhibitor 1C | -1.10 | 2.40E-04 |
| *MT1X* | metallothionein 1X | -1.10 | 8.76771E-08 |
| *CST3* | cystatin C | -1.09 | 3.30E-05 |
| *OLAH* | oleoyl-ACP hydrolase | -1.09 | 6.50E-03 |
| *ISM1* | isthmin 1 | -1.08 | 0.009823468 |
| *ZNF385B* | zinc finger protein 385B | -1.08 | 0.008080662 |
| *EDN1* | endothelin 1 | -1.07 | 0.005995502 |
| *FAM166B* | family with sequence similarity 166 member B | -1.07 | 0.00842496 |
| *NOSTRIN* | nitric oxide synthase trafficking | -1.07 | 0.005427007 |
| *CACNB2* | calcium voltage-gated channel auxiliary subunit beta 2 | -1.06 | 5.31E-05 |
| *ADH1A* | alcohol dehydrogenase 1A (class I), alpha polypeptide | -1.06 | 0.008080662 |
| *NA* | NA | -1.06 | 2.92E-04 |
| *STK17B* | serine/threonine kinase 17b | -1.06 | 0.00073653 |
| *WASF3* | WASP family member 3 | -1.06 | 1.8619E-18 |
| *POU3F3* | POU class 3 homeobox 3 | -1.05 | 0.011501075 |
| *SYNE2* | spectrin repeat containing nuclear envelope protein 2 | -1.05 | 0.005255904 |
| *HLX* | H2.0 like homeobox | -1.04 | 5.50293E-12 |
| *SOX13* | SRY-box transcription factor 13 | -1.04 | 1.31011E-08 |
| *ADARB1* | adenosine deaminase RNA specific B1 | -1.03 | 0.001917124 |
| *GREB1L* | GREB1 like retinoic acid receptor coactivator | -1.03 | 5.35584E-06 |
| *SERPINA3* | serpin family A member 3 | -1.03 | 0.013858835 |
| *SMOC2* | SPARC related modular calcium binding 2 | -1.03 | 0.002584458 |
| *GLYAT* | glycine-N-acyltransferase | -1.02 | 0.014558379 |
| *MAP2K6* | mitogen-activated protein kinase kinase 6 | -1.01 | 0.015888699 |
| *ANGPTL5* | angiopoietin like 5 | -1.01 | 0.019781645 |
| *NA* | NA | -1.01 | 0.004317435 |
| *AOX1* | aldehyde oxidase 1 | -1.00 | 0.00062806 |
| *EYA2* | EYA transcriptional coactivator and phosphatase 2 | -1.00 | 0.012916704 |
| *CCDC54* | coiled-coil domain containing 54 | -1.00 | 2.25E-02 |
| *NRCAM* | neuronal cell adhesion molecule | -1.00 | 0.008061658 |
| *TRABD2B* | TraB domain containing 2B | -1.00 | 0.013858835 |
| *NEBL* | nebulette | -1.00 | 0.021379713 |
| *RASSF4* | Ras association domain family member 4 | -1.00 | 3.84958E-06 |
| *RIPOR3* | RIPOR family member 3 | -1.00 | 0.024466138 |
| *CYP4Z2P* | cytochrome P450 family 4 subfamily Z member 2, pseudogene | -0.99 | 0.019980284 |
| *ADH1B* | alcohol dehydrogenase 1B (class I), beta polypeptide | -0.99 | 0.019748554 |
| *ROBO2* | roundabout guidance receptor 2 | -0.99 | 2.24E-02 |
| *ANPEP* | alanyl aminopeptidase, membrane | -0.98 | 1.93E-04 |
| *NGFR* | nerve growth factor receptor | -0.97 | 0.012356687 |
| *DHRS3* | dehydrogenase/reductase 3 | -0.97 | 1.67508E-05 |
| *PPP4R4* | protein phosphatase 4 regulatory subunit 4 | -0.97 | 0.028182462 |
| *NID1* | nidogen 1 | -0.97 | 3.67673E-11 |
| *TACC1* | transforming acidic coiled-coil containing protein 1 | -0.97 | 1.08525E-08 |
| *LAMA2* | laminin subunit alpha 2 | -0.97 | 4.88473E-06 |
| *ZNF395* | zinc finger protein 395 | -0.97 | 7.15001E-13 |
| *TNFSF10* | TNF superfamily member 10 | -0.97 | 0.016609283 |
| *NPY5R* | neuropeptide Y receptor Y5 | -0.97 | 0.027192915 |
| *SPATA41* | spermatogenesis associated 41 | -0.96 | 0.022419483 |
| *CFD* | complement factor D | -0.96 | 0.00285215 |
| *CORO6* | coronin 6 | -0.95 | 5.06E-04 |
| *RNF144B* | ring finger protein 144B | -0.95 | 0.027643637 |
| *NPR3* | natriuretic peptide receptor 3 | -0.95 | 0.009253616 |
| *FRZB* | frizzled related protein | -0.94 | 0.038107473 |
| *IP6K3* | inositol hexakisphosphate kinase 3 | -0.94 | 0.034988853 |
| *TRPV6* | transient receptor potential cation channel subfamily V member 6 | -0.94 | 0.037485797 |
| *NEXN* | nexilin F-actin binding protein | -0.94 | 0.002125546 |
| *HPSE* | heparanase | -0.94 | 0.037619397 |
| *FAM107A* | family with sequence similarity 107 member A | -0.94 | 0.041835677 |
| *RXFP1* | relaxin family peptide receptor 1 | -0.93 | 0.042064995 |
| *SMARCD2* | SWI/SNF related, matrix associated, actin dependent regulator of chromatin, subfamily d, member 2 | -0.93 | 4.03555E-17 |
| *ARMC12* | armadillo repeat containing 12 | -0.93 | 0.009686755 |
| *DAAM2-AS1* | DAAM2 antisense RNA 1 | -0.93 | 0.01375562 |
| *BOC* | BOC cell adhesion associated, oncogene regulated | -0.93 | 4.65E-03 |
| *NA* | NA | -0.93 | 0.040280158 |
| *NA* | NA | -0.93 | 0.037007018 |
| *SSH2* | slingshot protein phosphatase 2 | -0.93 | 6.58E-05 |
| *CTHRC1* | collagen triple helix repeat containing 1 | -0.93 | 0.007646033 |
| *SLC2A13* | solute carrier family 2 member 13 | -0.92 | 0.005695219 |
| *NPY1R* | neuropeptide Y receptor Y1 | -0.91 | 0.028464297 |
| *AFAP1L1* | actin filament associated protein 1 like 1 | -0.91 | 0.041186015 |
| *SAMHD1* | SAM and HD domain containing deoxynucleoside triphosphate triphosphohydrolase 1 | -0.91 | 0.024527896 |
| *IQCH-AS1* | IQCH antisense RNA 1 | -0.91 | 2.56892E-05 |
| *OLFM2* | olfactomedin 2 | -0.90 | 4.10E-05 |
| *NAV2* | neuron navigator 2 | -0.90 | 6.20E-05 |
| *TMEM150C* | transmembrane protein 150C | -0.89 | 0.032617469 |
| *GRK5* | G protein-coupled receptor kinase 5 | -0.89 | 0.00166459 |
| *TGFBR2* | transforming growth factor beta receptor 2 | -0.89 | 3.94342E-32 |
| *TNS2* | tensin 2 | -0.89 | 1.27664E-07 |
| *CAB39L* | calcium binding protein 39 like | -0.89 | 1.23606E-05 |
| *TMEM64* | transmembrane protein 64 | -0.89 | 0.001473297 |
| *ICOSLG* | inducible T cell costimulator ligand | -0.88 | 4.09E-03 |
| *DNASE1L3* | deoxyribonuclease 1 like 3 | -0.88 | 0.023948217 |
| *CUTC* | cutC copper transporter | -0.88 | 4.42008E-07 |
| *TNNT3* | troponin T3, fast skeletal type | -0.88 | 3.21E-02 |
| *TUBA8* | tubulin alpha 8 | -0.88 | 6.78E-04 |
| *RAB40A* | RAB40A, member RAS oncogene family | -0.88 | 0.011749104 |
| *HNMT* | histamine N-methyltransferase | -0.87 | 0.006531785 |
| *GSN* | gelsolin | -0.87 | 0.034022986 |
| *LINC00921* | long intergenic non-protein coding RNA 921 | -0.86 | 6.21E-04 |
| *TCEAL4* | transcription elongation factor A like 4 | -0.85 | 9.01E-04 |
| *DNAJC6* | DnaJ heat shock protein family (Hsp40) member C6 | -0.85 | 0.007612416 |
| *RNASE4* | ribonuclease A family member 4 | -0.85 | 6.26E-05 |
| *IRS2* | insulin receptor substrate 2 | -0.85 | 0.002256864 |
| *CSRNP3* | cysteine and serine rich nuclear protein 3 | -0.85 | 0.037619397 |
| *GUCY1B1* | guanylate cyclase 1 soluble subunit beta 1 | -0.84 | 0.019781645 |
| *LAMA3* | laminin subunit alpha 3 | -0.84 | 4.55E-03 |
| *CTSC* | cathepsin C | -0.84 | 0.013166092 |
| *TMEM119* | transmembrane protein 119 | -0.82 | 0.043667191 |
| *BMPR1B* | bone morphogenetic protein receptor type 1B | -0.82 | 0.002799133 |
| *EVA1C* | eva-1 homolog C | -0.82 | 2.98E-03 |
| *FOXO1* | forkhead box O1 | -0.81 | 7.67E-04 |
| *LINC00968* | long intergenic non-protein coding RNA 968 | -0.80 | 0.037925198 |
| *ABCA6* | ATP binding cassette subfamily A member 6 | -0.80 | 0.047838824 |
| *FBLN2* | fibulin 2 | -0.79 | 1.81E-04 |
| *RHOBTB3* | Rho related BTB domain containing 3 | -0.79 | 0.013385188 |
| *ZHX3* | zinc fingers and homeoboxes 3 | -0.79 | 7.56081E-06 |
| *ELANE* | elastase, neutrophil expressed | -0.79 | 0.019363023 |
| *TLR4* | toll like receptor 4 | -0.79 | 0.000798292 |
| *FBLN5* | fibulin 5 | -0.79 | 0.047104552 |
| *JAK2* | Janus kinase 2 | -0.79 | 1.56E-04 |
| *SERPING1* | serpin family G member 1 | -0.79 | 4.38E-04 |
| *PLPP3* | phospholipid phosphatase 3 | -0.78 | 0.00240489 |
| *PDGFRA* | platelet derived growth factor receptor alpha | -0.78 | 1.28E-04 |
| *FUT8-AS1* | FUT8 antisense RNA 1 | -0.77 | 0.030646591 |
| *ANG* | angiogenin | -0.77 | 2.18E-06 |
| *PROSER2* | proline and serine rich 2 | -0.77 | 0.03585722 |
| *TMEM158* | transmembrane protein 158 | -0.76 | 0.012916704 |
| *NABP1* | nucleic acid binding protein 1 | -0.76 | 0.00185271 |
| *MBNL2* | muscleblind like splicing regulator 2 | -0.76 | 0.002457234 |
| *CALCOCO2* | calcium binding and coiled-coil domain 2 | -0.76 | 2.53E-04 |
| *DSEL* | dermatan sulfate epimerase like | -0.75 | 0.027172422 |
| *APOL3* | apolipoprotein L3 | -0.75 | 0.005398914 |
| *SH3D19* | SH3 domain containing 19 | -0.75 | 0.00842496 |
| *SYP* | synaptophysin | -0.75 | 0.043274778 |
| *PLCL1* | phospholipase C like 1 (inactive) | -0.74 | 0.018046668 |
| *ZFP36* | ZFP36 ring finger protein | -0.74 | 2.36207E-06 |
| *SLC4A11* | solute carrier family 4 member 11 | -0.74 | 3.87E-02 |
| *PID1* | phosphotyrosine interaction domain containing 1 | -0.74 | 0.037987105 |
| *GAS6* | growth arrest specific 6 | -0.73 | 0.000983242 |
| *NA* | NA | -0.73 | 0.008061658 |
| *EPN2* | epsin 2 | -0.72 | 6.38E-04 |
| *IRS1* | insulin receptor substrate 1 | -0.72 | 3.37E-04 |
| *PDE8B* | phosphodiesterase 8B | -0.72 | 0.022575341 |
| *KLF13* | Kruppel like factor 13 | -0.72 | 4.11E-05 |
| *FOXO3* | forkhead box O3 | -0.71 | 1.92007E-09 |
| *ARRDC2* | arrestin domain containing 2 | -0.71 | 0.00062806 |
| *MFAP5* | microfibril associated protein 5 | -0.71 | 0.018804338 |
| *ZEB1* | zinc finger E-box binding homeobox 1 | -0.70 | 0.021504341 |
| *MPP3* | membrane palmitoylated protein 3 | -0.70 | 1.12E-02 |
| *TRAF1* | TNF receptor associated factor 1 | -0.70 | 2.52E-04 |
| *LRP4* | LDL receptor related protein 4 | -0.70 | 3.71E-03 |

**Supplementary Table 5.** DEGs from comparison of active beige adipocytes carrying *FTO* obesity-risk vs risk-free genotypes; n=4 of each genotype

| **Symbol** | **Gene Name** | **Log2 Fold Change** | **Adj. P value** |
| --- | --- | --- | --- |
| *MAOB* | monoamine oxidase B | -2.03 | 2.99E-16 |
| *NKD2* | NKD inhibitor of WNT signaling pathway 2 | -1.86 | 8.11E-06 |
| *C16orf89* | chromosome 16 open reading frame 89 | -1.84 | 1.35E-05 |
| *PLXNC1* | plexin C1 | -1.82 | 1.18E-04 |
| *MAPK8IP2* | mitogen-activated protein kinase 8 interacting protein 2 | -1.74 | 8.14E-11 |
| *SYT17* | synaptotagmin 17 | -1.74 | 1.18E-04 |
| *CDHR1* | cadherin related family member 1 | -1.74 | 2.38E-04 |
| *ABHD1* | abhydrolase domain containing 1 | -1.68 | 2.52E-04 |
| *CKMT2* | creatine kinase, mitochondrial 2 | -1.62 | 5.75E-04 |
| *SIM1* | SIM bHLH transcription factor 1 | -1.61 | 4.11E-04 |
| *PPP1R1B* | protein phosphatase 1 regulatory inhibitor subunit 1B | -1.61 | 0.000575113 |
| *UCP2* | uncoupling protein 2 | -1.60 | 2.38E-04 |
| *ZNF385A* | zinc finger protein 385A | -1.58 | 1.29E-08 |
| *LDHD* | lactate dehydrogenase D | -1.57 | 0.000118498 |
| *ANO5* | anoctamin 5 | -1.56 | 2.01E-03 |
| *RBM47* | RNA binding motif protein 47 | -1.51 | 2.38E-04 |
| *MYH14* | myosin heavy chain 14 | -1.50 | 1.18E-04 |
| *ALDH3B2* | aldehyde dehydrogenase 3 family member B2 | -1.50 | 4.44E-03 |
| *KCNB1* | potassium voltage-gated channel subfamily B member 1 | -1.49 | 0.002342861 |
| *RAMP2-AS1* | RAMP2 antisense RNA 1 | -1.49 | 2.76E-03 |
| *TRDC* | T cell receptor delta constant | -1.47 | 5.17E-03 |
| *ERV3-1* | endogenous retrovirus group 3 member 1, envelope | -1.47 | 1.40E-04 |
| *MAPK10* | mitogen-activated protein kinase 10 | -1.45 | 0.001513359 |
| *SCD* | stearoyl-CoA desaturase | -1.42 | 0.002342861 |
| *ACACB* | acetyl-CoA carboxylase beta | -1.42 | 0.002763087 |
| *NR1H3* | nuclear receptor subfamily 1 group H member 3 | -1.42 | 5.57E-03 |
| *CLIC6* | chloride intracellular channel 6 | -1.41 | 5.17E-03 |
| *STON2* | stonin 2 | -1.41 | 0.003146207 |
| *KIF1A* | kinesin family member 1A | -1.41 | 0.007671087 |
| *GPAM* | glycerol-3-phosphate acyltransferase, mitochondrial | -1.41 | 6.74E-03 |
| *PRKG2* | protein kinase cGMP-dependent 2 | -1.40 | 8.34E-03 |
| *C1orf115* | chromosome 1 open reading frame 115 | -1.39 | 8.23E-03 |
| *CES1* | carboxylesterase 1 | -1.39 | 3.98E-03 |
| *GPD1* | glycerol-3-phosphate dehydrogenase 1 | -1.38 | 7.97E-03 |
| *APCDD1* | APC down-regulated 1 | -1.38 | 9.7593E-05 |
| *ELOVL6* | ELOVL fatty acid elongase 6 | -1.38 | 1.05E-02 |
| *FCN1* | ficolin 1 | -1.38 | 0.010962781 |
| *AQP7P1* | aquaporin 7 pseudogene 1 | -1.37 | 0.007384258 |
| *PLAAT5* | phospholipase A and acyltransferase 5 | -1.36 | 9.42E-03 |
| *PPP1R1A* | protein phosphatase 1 regulatory inhibitor subunit 1A | -1.36 | 0.007918342 |
| *S100B* | S100 calcium binding protein B | -1.35 | 0.015108531 |
| *CDH23* | cadherin related 23 | -1.34 | 0.016546538 |
| *RET* | ret proto-oncogene | -1.34 | 0.013288966 |
| *LHCGR* | luteinizing hormone/choriogonadotropin receptor | -1.34 | 0.014115139 |
| *ACSF2* | acyl-CoA synthetase family member 2 | -1.32 | 0.003227973 |
| *GRK3* | G protein-coupled receptor kinase 3 | -1.30 | 0.011607392 |
| *MOGAT1* | monoacylglycerol O-acyltransferase 1 | -1.30 | 0.021836614 |
| *ME1* | malic enzyme 1 | -1.30 | 0.00477724 |
| *CIDEC* | cell death inducing DFFA like effector c | -1.29 | 0.013532874 |
| *SHMT1* | serine hydroxymethyltransferase 1 | -1.28 | 0.010334498 |
| *PRKAR2B* | protein kinase cAMP-dependent type II regulatory subunit beta | -1.28 | 0.01008547 |
| *SORL1* | sortilin related receptor 1 | -1.28 | 0.017034961 |
| *CDK15* | cyclin dependent kinase 15 | -1.27 | 0.021836614 |
| *LGALS12* | galectin 12 | -1.27 | 0.018978932 |
| *PXDNL* | peroxidasin like | -1.27 | 2.71E-02 |
| *SLC29A4* | solute carrier family 29 member 4 | -1.27 | 1.32603E-06 |
| *ADIPOQ* | adiponectin, C1Q and collagen domain containing | -1.26 | 2.54E-02 |
| *GYG2* | glycogenin 2 | -1.26 | 0.003089649 |
| *PLEKHG1* | pleckstrin homology and RhoGEF domain containing G1 | -1.26 | 0.022551038 |
| *USP51* | ubiquitin specific peptidase 51 | -1.26 | 0.003089649 |
| *CLMN* | calmin | -1.25 | 0.02264628 |
| *PIWIL2* | piwi like RNA-mediated gene silencing 2 | -1.24 | 0.032058082 |
| *FGR* | FGR proto-oncogene, Src family tyrosine kinase | -1.24 | 0.030852179 |
| *PDE3B* | phosphodiesterase 3B | -1.24 | 0.028787624 |
| *APOE* | apolipoprotein E | -1.23 | 0.01729454 |
| *NNAT* | neuronatin | -1.23 | 0.008226534 |
| *ACSS2* | acyl-CoA synthetase short chain family member 2 | -1.23 | 0.022483074 |
| *SV2A* | synaptic vesicle glycoprotein 2A | -1.22 | 0.031596998 |
| *C14orf180* | chromosome 14 open reading frame 180 | -1.22 | 0.027149535 |
| *PCSK1N* | proprotein convertase subtilisin/kexin type 1 inhibitor | -1.22 | 0.035904464 |
| *SLC47A1* | solute carrier family 47 member 1 | -1.22 | 0.010775028 |
| *FNDC4* | fibronectin type III domain containing 4 | -1.22 | 0.000891511 |
| *FCRLB* | Fc receptor like B | -1.22 | 0.001587728 |
| *ALDH1L1* | aldehyde dehydrogenase 1 family member L1 | -1.21 | 0.034105208 |
| *LRRC2* | leucine rich repeat containing 2 | -1.21 | 0.014644374 |
| *TMEM132C* | transmembrane protein 132C | -1.21 | 0.022551038 |
| *MVD* | mevalonate diphosphate decarboxylase | -1.21 | 2.49E-02 |
| *HAVCR2* | hepatitis A virus cellular receptor 2 | -1.21 | 0.01008547 |
| *ACHE* | acetylcholinesterase (Cartwright blood group) | -1.21 | 0.038909524 |
| *SNX10* | sorting nexin 10 | -1.20 | 0.008209466 |
| *C3* | complement C3 | -1.20 | 3.88E-02 |
| *CHCHD10* | coiled-coil-helix-coiled-coil-helix domain containing 10 | -1.20 | 2.4113E-06 |
| *CNTFR* | ciliary neurotrophic factor receptor | -1.19 | 2.71E-02 |
| *PFKFB1* | 6-phosphofructo-2-kinase/fructose-2,6-biphosphatase 1 | -1.19 | 0.045723788 |
| *RAMP2* | receptor activity modifying protein 2 | -1.19 | 0.015108531 |
| *ENPP3* | ectonucleotide pyrophosphatase/phosphodiesterase 3 | -1.18 | 0.047397997 |
| *CITED1* | Cbp/p300 interacting transactivator with Glu/Asp rich carboxy-terminal domain 1 | -1.18 | 0.015187005 |
| *NDRG2* | NDRG family member 2 | -1.17 | 0.014644374 |
| *DMRT2* | doublesex and mab-3 related transcription factor 2 | -1.17 | 0.043224137 |
| *FCHO1* | FCH and mu domain containing endocytic adaptor 1 | -1.16 | 0.040220188 |
| *PTPN3* | protein tyrosine phosphatase non-receptor type 3 | -1.16 | 0.018033508 |
| *SORBS1* | sorbin and SH3 domain containing 1 | -1.16 | 0.027149535 |
| *PLIN1* | perilipin 1 | -1.14 | 2.73E-02 |
| *EPHX2* | epoxide hydrolase 2 | -1.13 | 0.029536942 |
| *DTX1* | deltex E3 ubiquitin ligase 1 | -1.12 | 0.048963604 |
| *PC* | pyruvate carboxylase | -1.12 | 0.010663838 |
| *DHRS9* | dehydrogenase/reductase 9 | -1.12 | 3.62E-02 |
| *LIPE* | lipase E, hormone sensitive type | -1.12 | 0.045411139 |
| *RASD1* | ras related dexamethasone induced 1 | -1.12 | 0.028343244 |
| *ACSL1* | acyl-CoA synthetase long chain family member 1 | -1.12 | 0.040220188 |
| *F11R* | F11 receptor | -1.11 | 0.028343244 |
| *AOC3* | amine oxidase copper containing 3 | -1.11 | 4.13E-02 |
| *BMF* | Bcl2 modifying factor | -1.11 | 1.08E-02 |
| *PALMD* | palmdelphin | -1.11 | 0.018807118 |
| *TM7SF2* | transmembrane 7 superfamily member 2 | -1.10 | 3.90E-02 |
| *PPM1L* | protein phosphatase, Mg2+/Mn2+ dependent 1L | -1.09 | 0.021242961 |
| *PPARGC1B* | PPARG coactivator 1 beta | -1.09 | 0.028787624 |
| *LPCAT3* | lysophosphatidylcholine acyltransferase 3 | -1.09 | 0.035725208 |
| *REEP6* | receptor accessory protein 6 | -1.09 | 0.019949871 |
| *PDZD2* | PDZ domain containing 2 | -1.09 | 0.004263226 |
| *PKP2* | plakophilin 2 | -1.08 | 0.014644374 |
| *RETSAT* | retinol saturase | -1.08 | 0.004014571 |
| *METTL7A* | methyltransferase like 7A | -1.08 | 0.026331007 |
| *SLC25A10* | solute carrier family 25 member 10 | -1.07 | 0.000579646 |
| *AGPAT2* | 1-acylglycerol-3-phosphate O-acyltransferase 2 | -1.07 | 0.003244399 |
| *HADH* | hydroxyacyl-CoA dehydrogenase | -1.07 | 0.00929179 |
| *AR* | androgen receptor | -1.07 | 0.038909524 |
| *CLU* | clusterin | -1.03 | 0.038780413 |
| *CA5B* | carbonic anhydrase 5B | -1.03 | 0.029536942 |
| *PECR* | peroxisomal trans-2-enoyl-CoA reductase | -1.01 | 0.047397997 |
| *PLAAT3* | phospholipase A and acyltransferase 3 | -1.01 | 0.001587728 |
| *STBD1* | starch binding domain 1 | -1.00 | 0.027149535 |
| *TMEM37* | transmembrane protein 37 | -1.00 | 0.028787624 |
| *MTARC2* | mitochondrial amidoxime reducing component 2 | -1.00 | 0.000610427 |
| *SLC25A1* | solute carrier family 25 member 1 | -0.99 | 0.016546538 |
| *PNPLA2* | patatin like phospholipase domain containing 2 | -0.99 | 0.028787624 |
| *VKORC1L1* | vitamin K epoxide reductase complex subunit 1 like 1 | -0.98 | 0.007907268 |
| *SOBP* | sine oculis binding protein homolog | -0.98 | 0.005169488 |
| *CLYBL* | citramalyl-CoA lyase | -0.97 | 0.023792175 |
| *ACACA* | acetyl-CoA carboxylase alpha | -0.96 | 0.010455128 |
| *ZNF608* | zinc finger protein 608 | -0.96 | 0.038965181 |
| *WDR31* | WD repeat domain 31 | -0.96 | 0.034798199 |
| *ACLY* | ATP citrate lyase | -0.96 | 0.034105208 |
| *PDP2* | pyruvate dehyrogenase phosphatase catalytic subunit 2 | -0.96 | 0.011847894 |
| *C2CD2* | C2 calcium dependent domain containing 2 | -0.95 | 0.047397997 |
| *CS* | citrate synthase | -0.94 | 0.000827079 |
| *EPB41* | erythrocyte membrane protein band 4.1 | -0.94 | 0.000575113 |
| *LETM1* | leucine zipper and EF-hand containing transmembrane protein 1 | -0.93 | 0.028787624 |
| *RRAGD* | Ras related GTP binding D | -0.93 | 0.018978932 |
| *PLCD4* | phospholipase C delta 4 | -0.93 | 0.04761052 |
| *CPT2* | carnitine palmitoyltransferase 2 | -0.92 | 0.002342861 |
| *CPEB1* | cytoplasmic polyadenylation element binding protein 1 | -0.91 | 0.042067429 |
| *EPHX1* | epoxide hydrolase 1 | -0.90 | 0.005567697 |
| *RALGAPA2* | Ral GTPase activating protein catalytic subunit alpha 2 | -0.90 | 0.007384258 |
| *DECR1* | 2,4-dienoyl-CoA reductase 1 | -0.90 | 0.009411958 |
| *PCCA* | propionyl-CoA carboxylase subunit alpha | -0.89 | 0.028343244 |
| *SIK2* | salt inducible kinase 2 | -0.88 | 0.012177877 |
| *GPT2* | glutamic--pyruvic transaminase 2 | -0.88 | 0.004014571 |
| *ADIPOR2* | adiponectin receptor 2 | -0.87 | 0.025051449 |
| *TSHZ2* | teashirt zinc finger homeobox 2 | -0.86 | 0.037803355 |
| *ACAA2* | acetyl-CoA acyltransferase 2 | -0.86 | 0.010663838 |
| *ARHGAP42* | Rho GTPase activating protein 42 | -0.86 | 0.047645591 |
| *COX3* | cytochrome c oxidase subunit III | -0.84 | 0.001587728 |
| *FAH* | fumarylacetoacetate hydrolase | -0.84 | 0.025409004 |
| *MLYCD* | malonyl-CoA decarboxylase | -0.84 | 0.036999293 |
| *THEM6* | thioesterase superfamily member 6 | -0.84 | 0.040907997 |
| *ALDH5A1* | aldehyde dehydrogenase 5 family member A1 | -0.84 | 0.042878515 |
| *ETFDH* | electron transfer flavoprotein dehydrogenase | -0.82 | 0.043061694 |
| *ACY1* | aminoacylase 1 | -0.82 | 0.017682411 |
| *GAREM1* | GRB2 associated regulator of MAPK1 subtype 1 | -0.82 | 0.034105208 |
| *MKNK2* | MAPK interacting serine/threonine kinase 2 | -0.81 | 0.023265475 |
| *ELOVL5* | ELOVL fatty acid elongase 5 | -0.80 | 0.010455128 |
| *ISOC1* | isochorismatase domain containing 1 | -0.79 | 0.0468927 |
| *DGAT1* | diacylglycerol O-acyltransferase 1 | -0.79 | 0.017034961 |
| *HOOK2* | hook microtubule tethering protein 2 | -0.78 | 5.57E-03 |
| *DHTKD1* | dehydrogenase E1 and transketolase domain containing 1 | -0.75 | 0.028787624 |
| *ACAD10* | acyl-CoA dehydrogenase family member 10 | -0.74 | 0.026549713 |
| *APBB1IP* | amyloid beta precursor protein binding family B member 1 interacting protein | -0.74 | 0.007442582 |
| *PCDHGB7* | protocadherin gamma subfamily B, 7 | -0.72 | 0.004519361 |
| *ACO2* | aconitase 2 | -0.71 | 0.016085516 |
| *SLC25A51* | solute carrier family 25 member 51 | -0.71 | 4.31E-02 |
| *CLUH* | clustered mitochondria homolog | -0.71 | 0.04467553 |
| *TECR* | trans-2,3-enoyl-CoA reductase | -0.70 | 0.028787624 |
| *COX1* | cytochrome c oxidase subunit I | -0.70 | 0.024248613 |
| *ARHGAP32* | Rho GTPase activating protein 32 | -0.70 | 0.021836614 |
| *ERAP2* | endoplasmic reticulum aminopeptidase 2 | 2.37 | 8.08937E-11 |
| *CLEC14A* | C-type lectin domain containing 14A | 1.45 | 0.000695096 |
| *OLR1* | oxidized low density lipoprotein receptor 1 | 1.33 | 0.014644374 |
| *NOG* | noggin | 1.30 | 7.85E-03 |
| *PTGS2* | prostaglandin-endoperoxide synthase 2 | 1.29 | 0.003089649 |
| *PEAR1* | platelet endothelial aggregation receptor 1 | 1.25 | 0.000238258 |
| *CARD9* | caspase recruitment domain family member 9 | 1.24 | 0.024780772 |
| *KRT34* | keratin 34 | 1.24 | 2.83E-02 |
| *TBX1* | T-box transcription factor 1 | 1.23 | 3.56E-02 |
| *FLT1* | fms related receptor tyrosine kinase 1 | 1.20 | 0.029536942 |
| *CADPS* | calcium dependent secretion activator | 1.18 | 1.65E-02 |
| *SCUBE3* | signal peptide, CUB domain and EGF like domain containing 3 | 1.18 | 4.92E-02 |
| *ISYNA1* | inositol-3-phosphate synthase 1 | 1.16 | 1.03E-02 |
| *PCSK9* | proprotein convertase subtilisin/kexin type 9 | 1.09 | 2.67E-03 |

**Supplementary Table 6.** DEGs from comparison of inactive beige adipocytes carrying *FTO* obesity-risk vs risk-free genotypes; n=4 of each genotype

| **Symbol** | **Gene Name** | **Log2 Fold Change** | **Adj. P value** |
| --- | --- | --- | --- |
| *CLIC6* | chloride intracellular channel 6 | -1.50 | 8.59E-03 |
| *PLXNC1* | plexin C1 | -1.44 | 1.92E-02 |
| *UCP2* | uncoupling protein 2 | -1.41 | 5.30E-03 |
| *CNGA3* | cyclic nucleotide gated channel subunit alpha 3 | -1.39 | 3.11E-02 |
| *STON2* | stonin 2 | -1.36 | 2.74E-02 |
| *ZNF385A* | zinc finger protein 385A | -1.36 | 1.43E-04 |
| *SIM1* | SIM bHLH transcription factor 1 | -1.33 | 9.37E-03 |
| *TXLNB* | taxilin beta | -1.32 | 4.36E-02 |
| *PNLIPRP3* | pancreatic lipase related protein 3 | -1.31 | 4.51E-02 |
| *NA* | NA | -1.02 | 4.63E-02 |
| *BMF* | Bcl2 modifying factor | -0.89 | 0.031123633 |
| *ERAP2* | endoplasmic reticulum aminopeptidase 2 | 3.22 | 2.22E-42 |
| *NOG* | noggin | 1.87 | 2.73192E-05 |
| *SEMA5B* | semaphorin 5B | 1.81 | 1.43E-04 |
| *FLT1* | fms related receptor tyrosine kinase 1 | 1.78 | 1.87E-04 |
| *GDF7* | growth differentiation factor 7 | 1.59 | 4.33E-03 |
| *CLEC14A* | C-type lectin domain containing 14A | 1.54 | 1.03E-04 |
| *CARD9* | caspase recruitment domain family member 9 | 1.50 | 7.45E-03 |
| *PEAR1* | platelet endothelial aggregation receptor 1 | 1.49 | 0.000143015 |
| *CPA4* | carboxypeptidase A4 | 1.49 | 1.71E-03 |
| *LGR5* | leucine rich repeat containing G protein-coupled receptor 5 | 1.48 | 0.007978884 |
| *DIO2* | iodothyronine deiodinase 2 | 1.42 | 2.41E-02 |
| *TRPC6* | transient receptor potential cation channel subfamily C member 6 | 1.40 | 0.027381653 |
| *SCUBE3* | signal peptide, CUB domain and EGF like domain containing 3 | 1.37 | 0.033390076 |
| *CDH8* | cadherin 8 | 1.35 | 0.036257298 |
| *ADRA2C* | adrenoceptor alpha 2C | 1.34 | 0.040177627 |
| *ANKRD29* | ankyrin repeat domain 29 | 1.33 | 1.26E-04 |
| *TSPAN8* | tetraspanin 8 | 1.30 | 3.45E-02 |
| *TINAGL1* | tubulointerstitial nephritis antigen like 1 | 1.30 | 0.049441547 |
| *PADI2* | peptidyl arginine deiminase 2 | 1.29 | 4.88E-02 |
| *MET* | MET proto-oncogene, receptor tyrosine kinase | 1.26 | 0.042189152 |
| *TGM1* | transglutaminase 1 | 1.22 | 4.94E-02 |
| *ISYNA1* | inositol-3-phosphate synthase 1 | 1.18 | 0.036257298 |
| *MGARP* | mitochondria localized glutamic acid rich protein | 1.17 | 4.10E-05 |
| *MIR210HG* | MIR210 host gene | 1.17 | 0.045120682 |
| *BDNF* | brain derived neurotrophic factor | 1.11 | 0.046302206 |
| *THSD4* | thrombospondin type 1 domain containing 4 | 1.11 | 0.033426202 |
| *FHL1* | four and a half LIM domains 1 | 1.11 | 2.07E-02 |
| *XRRA1* | X-ray radiation resistance associated 1 | 1.07 | 9.04E-07 |
| *MYH3* | myosin heavy chain 3 | 1.06 | 0.0416563 |
| *EMP1* | epithelial membrane protein 1 | 1.04 | 0.003956507 |
| *GDNF* | glial cell derived neurotrophic factor | 1.02 | 0.034848749 |
| *ULK4* | unc-51 like kinase 4 | 1.00 | 0.046302206 |
| *SLC1A1* | solute carrier family 1 member 1 | 0.98 | 0.003278171 |
| *FANK1* | fibronectin type III and ankyrin repeat domains 1 | 0.98 | 3.14E-02 |
| *ITGB3BP* | integrin subunit beta 3 binding protein | 0.90 | 1.77E-02 |
| *EXOG* | exo/endonuclease G | 0.90 | 0.046302206 |
| *MAP4K3-DT* | MAP4K3 divergent transcript | 0.89 | 0.043575692 |
| *ANGPT1* | angiopoietin 1 | 0.88 | 2.31E-02 |
| *ENDOD1* | endonuclease domain containing 1 | 0.88 | 8.40E-05 |
| *DNAJC6* | DnaJ heat shock protein family (Hsp40) member C6 | 0.85 | 0.036257298 |
| *LOX* | lysyl oxidase | 0.83 | 0.010401742 |
| *PRRX2* | paired related homeobox 2 | 0.79 | 0.044614199 |
| *TRNP1* | TMF1 regulated nuclear protein 1 | 0.77 | 0.0030316 |
| *PGM1* | phosphoglucomutase 1 | 0.77 | 0.040358227 |
| *ALPK2* | alpha kinase 2 | 0.75 | 0.043575692 |
| *STX6* | syntaxin 6 | 0.75 | 2.31E-02 |

**Supplementary Table 7.** DEGs from comparison of active beige and white adipocytes carrying FTO risk-free genotype; n=4 of each genotype

| **Symbol** | **Gene Name** | **Log2 Fold Change** | **Adj. P value** |
| --- | --- | --- | --- |
| *PCK1* | phosphoenolpyruvate carboxykinase 1 | 3.19 | 6.26E-23 |
| *CD96* | CD96 molecule | 2.97 | 2.95E-14 |
| *BBOX1* | gamma-butyrobetaine hydroxylase 1 | 2.76 | 1.31E-15 |
| *KRT79* | keratin 79 | 2.75 | 4.72E-12 |
| *TMEM132C* | transmembrane protein 132C | 2.70 | 1.32E-14 |
| *PM20D1* | peptidase M20 domain containing 1 | 2.56 | 1.17E-09 |
| *SLC22A12* | solute carrier family 22 member 12 | 2.53 | 5.12E-10 |
| *FCN1* | ficolin 1 | 2.50 | 1.42E-09 |
| *ADAMTS18* | ADAM metallopeptidase with thrombospondin type 1 motif 18 | 2.42 | 2.94E-09 |
| *KCNA1* | potassium voltage-gated channel subfamily A member 1 | 2.37 | 1.36E-12 |
| *SCN4A* | sodium voltage-gated channel alpha subunit 4 | 2.31 | 4.35826E-09 |
| *MGAT3* | beta-1,4-mannosyl-glycoprotein 4-beta-N-acetylglucosaminyltransferase | 2.26 | 1.21E-11 |
| *NA* | NA | 2.26 | 4.05578E-08 |
| *TSHR* | thyroid stimulating hormone receptor | 2.24 | 2.55E-07 |
| *ABCG1* | ATP binding cassette subfamily G member 1 | 2.10 | 2.89E-16 |
| *AP3B2* | adaptor related protein complex 3 subunit beta 2 | 2.08 | 1.36E-12 |
| *CPA4* | carboxypeptidase A4 | 2.02 | 4.71E-07 |
| *PDE1B* | phosphodiesterase 1B | 2.02 | 2.92E-08 |
| *CASZ1* | castor zinc finger 1 | 2.01 | 8.87546E-07 |
| *CD52* | CD52 molecule | 2.00 | 6.53E-06 |
| *LHCGR* | luteinizing hormone/choriogonadotropin receptor | 1.94 | 6.17593E-07 |
| *KCNK12* | potassium two pore domain channel subfamily K member 12 | 1.94 | 1.91E-05 |
| *ANO5* | anoctamin 5 | 1.89 | 1.45464E-05 |
| *PDZD2* | PDZ domain containing 2 | 1.89 | 1.7319E-06 |
| *STX11* | syntaxin 11 | 1.88 | 9.57852E-11 |
| *PPP1R1A* | protein phosphatase 1 regulatory inhibitor subunit 1A | 1.85 | 2.77003E-06 |
| *LINC02554* | long intergenic non-protein coding RNA 2554 | 1.84 | 6.88E-05 |
| *CA3* | carbonic anhydrase 3 | 1.84 | 6.87E-05 |
| *PLPPR4* | phospholipid phosphatase related 4 | 1.84 | 2.98685E-06 |
| *LPL* | lipoprotein lipase | 1.83 | 1.88E-06 |
| *SLC22A3* | solute carrier family 22 member 3 | 1.82 | 1.71964E-07 |
| *CKMT1B* | creatine kinase, mitochondrial 1B | 1.81 | 2.30E-05 |
| *CYP4F12* | cytochrome P450 family 4 subfamily F member 12 | 1.81 | 3.61872E-07 |
| *ICA1* | islet cell autoantigen 1 | 1.79 | 2.50E-07 |
| *TRHDE-AS1* | TRHDE antisense RNA 1 | 1.78 | 1.43612E-09 |
| *CDH6* | cadherin 6 | 1.78 | 7.29733E-05 |
| *AQP3* | aquaporin 3 (Gill blood group) | 1.73 | 9.46377E-05 |
| *SORL1* | sortilin related receptor 1 | 1.71 | 1.83E-04 |
| *SCAMP5* | secretory carrier membrane protein 5 | 1.69 | 1.89E-05 |
| *FNDC1* | fibronectin type III domain containing 1 | 1.67 | 0.000236687 |
| *FABP4* | fatty acid binding protein 4 | 1.67 | 8.87546E-07 |
| *PLIN5* | perilipin 5 | 1.67 | 3.67898E-05 |
| *PLEKHG6* | pleckstrin homology and RhoGEF domain containing G6 | 1.66 | 9.35461E-06 |
| *CITED1* | Cbp/p300 interacting transactivator with Glu/Asp rich carboxy-terminal domain 1 | 1.64 | 2.16821E-05 |
| *CADM3* | cell adhesion molecule 3 | 1.64 | 6.94E-04 |
| *PALMD* | palmdelphin | 1.64 | 6.88E-05 |
| *EPB41L4B* | erythrocyte membrane protein band 4.1 like 4B | 1.64 | 6.39081E-05 |
| *RBM24* | RNA binding motif protein 24 | 1.63 | 8.57318E-06 |
| *FCHO1* | FCH and mu domain containing endocytic adaptor 1 | 1.60 | 7.13E-05 |
| *RGL3* | ral guanine nucleotide dissociation stimulator like 3 | 1.59 | 1.00E-04 |
| *UCP1* | uncoupling protein 1 | 1.59 | 0.001326054 |
| *IL1B* | interleukin 1 beta | 1.58 | 0.00058207 |
| *TRPM8* | transient receptor potential cation channel subfamily M member 8 | 1.56 | 0.001326054 |
| *TSPAN15* | tetraspanin 15 | 1.54 | 0.000344402 |
| *LRRC15* | leucine rich repeat containing 15 | 1.53 | 0.002078686 |
| *C4orf19* | chromosome 4 open reading frame 19 | 1.51 | 0.0021136 |
| *ADAM12* | ADAM metallopeptidase domain 12 | 1.51 | 4.52E-05 |
| *THBD* | thrombomodulin | 1.50 | 0.001543075 |
| *GK* | glycerol kinase | 1.50 | 1.7319E-06 |
| *ITGA8* | integrin subunit alpha 8 | 1.50 | 0.001901231 |
| *CLDN2* | claudin 2 | 1.50 | 0.00355501 |
| *LMO2* | LIM domain only 2 | 1.50 | 0.000755093 |
| *TMEM130* | transmembrane protein 130 | 1.50 | 0.003659612 |
| *ADIPOQ* | adiponectin, C1Q and collagen domain containing | 1.49 | 0.002078686 |
| *CTXN1* | cortexin 1 | 1.49 | 8.57318E-06 |
| *C1QTNF3* | C1q and TNF related 3 | 1.49 | 0.001193504 |
| *ECSCR* | endothelial cell surface expressed chemotaxis and apoptosis regulator | 1.48 | 0.004085113 |
| *MEST* | mesoderm specific transcript | 1.48 | 8.87116E-06 |
| *PCSK1* | proprotein convertase subtilisin/kexin type 1 | 1.48 | 8.09148E-05 |
| *RASD1* | ras related dexamethasone induced 1 | 1.48 | 1.26058E-10 |
| *ZNF365* | zinc finger protein 365 | 1.47 | 0.001730505 |
| *RTKN2* | rhotekin 2 | 1.45 | 0.000528277 |
| *RIMS4* | regulating synaptic membrane exocytosis 4 | 1.45 | 0.00207578 |
| *SCN9A* | sodium voltage-gated channel alpha subunit 9 | 1.45 | 0.003049696 |
| *GCOM1* | GRINL1A complex locus 1 | 1.44 | 1.57455E-05 |
| *MOGAT1* | monoacylglycerol O-acyltransferase 1 | 1.42 | 0.004013574 |
| *CDHR1* | cadherin related family member 1 | 1.41 | 1.59E-04 |
| *GRAP* | GRB2 related adaptor protein | 1.40 | 0.003659612 |
| *TMEM200C* | transmembrane protein 200C | 1.39 | 0.007634929 |
| *CIART* | circadian associated repressor of transcription | 1.39 | 3.06911E-05 |
| *PCDH19* | protocadherin 19 | 1.39 | 3.49E-03 |
| *IRF8* | interferon regulatory factor 8 | 1.38 | 0.008630167 |
| *LAMP3* | lysosomal associated membrane protein 3 | 1.37 | 8.86E-03 |
| *RXRG* | retinoid X receptor gamma | 1.36 | 0.001397029 |
| *SLC19A3* | solute carrier family 19 member 3 | 1.35 | 0.000470289 |
| *ADAMTS14* | ADAM metallopeptidase with thrombospondin type 1 motif 14 | 1.35 | 0.008943036 |
| *CYS1* | cystin 1 | 1.34 | 0.000667895 |
| *ACKR1* | atypical chemokine receptor 1 (Duffy blood group) | 1.34 | 0.012237669 |
| *LOC100507560* | uncharacterized LOC100507560 | 1.34 | 0.011658454 |
| *KLHDC7A* | kelch domain containing 7A | 1.34 | 0.015981012 |
| *APLP1* | amyloid beta precursor like protein 1 | 1.33 | 6.23237E-07 |
| *RGS7BP* | regulator of G protein signaling 7 binding protein | 1.33 | 0.004697797 |
| *TENT5C* | terminal nucleotidyltransferase 5C | 1.33 | 8.35E-03 |
| *CKMT1A* | creatine kinase, mitochondrial 1A | 1.32 | 0.017436439 |
| *CPA2* | carboxypeptidase A2 | 1.32 | 0.017127307 |
| *SRCIN1* | SRC kinase signaling inhibitor 1 | 1.32 | 0.005985029 |
| *HPSE2* | heparanase 2 (inactive) | 1.32 | 1.32E-02 |
| *MGAT4A* | alpha-1,3-mannosyl-glycoprotein 4-beta-N-acetylglucosaminyltransferase A | 1.31 | 0.005533282 |
| *EPHB2* | EPH receptor B2 | 1.30 | 0.002375381 |
| *CCN3* | cellular communication network factor 3 | 1.29 | 0.004008059 |
| *LBP* | lipopolysaccharide binding protein | 1.29 | 0.006272526 |
| *KCNK15* | potassium two pore domain channel subfamily K member 15 | 1.28 | 1.09E-02 |
| *ASS1* | argininosuccinate synthase 1 | 1.28 | 5.00E-12 |
| *FAM151A* | family with sequence similarity 151 member A | 1.27 | 0.025035351 |
| *EGFLAM* | EGF like, fibronectin type III and laminin G domains | 1.27 | 2.46E-03 |
| *SLC7A10* | solute carrier family 7 member 10 | 1.26 | 0.025674126 |
| *PTPN3* | protein tyrosine phosphatase non-receptor type 3 | 1.26 | 0.000752433 |
| *TRHDE* | thyrotropin releasing hormone degrading enzyme | 1.25 | 0.000632671 |
| *C14orf180* | chromosome 14 open reading frame 180 | 1.24 | 0.017017843 |
| *LINC01347* | long intergenic non-protein coding RNA 1347 | 1.23 | 0.03104806 |
| *DLX3* | distal-less homeobox 3 | 1.23 | 0.02712039 |
| *SYNGR2* | synaptogyrin 2 | 1.23 | 0.000643619 |
| *MPP7* | membrane palmitoylated protein 7 | 1.23 | 0.003245163 |
| *TMEM131L* | transmembrane 131 like | 1.23 | 1.87822E-06 |
| *HAS3* | hyaluronan synthase 3 | 1.22 | 0.024592675 |
| *CXADRP3* | CXADR pseudogene 3 | 1.22 | 0.037446998 |
| *CKMT2* | creatine kinase, mitochondrial 2 | 1.21 | 0.007824085 |
| *LOC100506253* | uncharacterized LOC100506253 | 1.21 | 0.040464703 |
| *ANOS1* | anosmin 1 | 1.21 | 0.040882609 |
| *CDH13* | cadherin 13 | 1.20 | 0.000146848 |
| *LUCAT1* | lung cancer associated transcript 1 | 1.20 | 0.030443356 |
| *PDE1C* | phosphodiesterase 1C | 1.20 | 0.022991064 |
| *L3MBTL4* | L3MBTL histone methyl-lysine binding protein 4 | 1.19 | 0.044001175 |
| *CIDEA* | cell death inducing DFFA like effector a | 1.19 | 0.047144109 |
| *GSG1* | germ cell associated 1 | 1.19 | 0.022143679 |
| *GTF2IP1* | general transcription factor IIi pseudogene 1 | 1.19 | 0.043541916 |
| *PLPP2* | phospholipid phosphatase 2 | 1.19 | 0.013450146 |
| *SAMD10* | sterile alpha motif domain containing 10 | 1.18 | 0.001888824 |
| *SH2D3C* | SH2 domain containing 3C | 1.18 | 0.03156525 |
| *FGF13* | fibroblast growth factor 13 | 1.17 | 0.027468375 |
| *ADGRB2* | adhesion G protein-coupled receptor B2 | 1.17 | 0.006143259 |
| *PPM1H* | protein phosphatase, Mg2+/Mn2+ dependent 1H | 1.16 | 0.003387417 |
| *DPYSL3* | dihydropyrimidinase like 3 | 1.16 | 8.87546E-07 |
| *HCAR3* | hydroxycarboxylic acid receptor 3 | 1.16 | 0.04886069 |
| *PLIN4* | perilipin 4 | 1.16 | 0.04518701 |
| *KRT14* | keratin 14 | 1.15 | 0.012986163 |
| *SLC24A4* | solute carrier family 24 member 4 | 1.15 | 0.048615779 |
| *SELPLG* | selectin P ligand | 1.15 | 0.0064944 |
| *FLVCR2* | FLVCR heme transporter 2 | 1.13 | 0.02712039 |
| *ATP1A3* | ATPase Na+/K+ transporting subunit alpha 3 | 1.13 | 0.04584214 |
| *PTGDS* | prostaglandin D2 synthase | 1.13 | 1.41466E-10 |
| *MMD* | monocyte to macrophage differentiation associated | 1.13 | 0.022316681 |
| *SAMD14* | sterile alpha motif domain containing 14 | 1.12 | 0.002348835 |
| *WARS1* | tryptophanyl-tRNA synthetase 1 | 1.12 | 0.001051673 |
| *MAP3K7CL* | MAP3K7 C-terminal like | 1.12 | 0.004977903 |
| *RGS2* | regulator of G protein signaling 2 | 1.11 | 8.22041E-05 |
| *ABCA3* | ATP binding cassette subfamily A member 3 | 1.11 | 0.022052525 |
| *FBXO27* | F-box protein 27 | 1.10 | 1.46454E-05 |
| *KIAA1549* | KIAA1549 | 1.09 | 0.007517754 |
| *FYB1* | FYN binding protein 1 | 1.09 | 0.007768415 |
| *HSD17B6* | hydroxysteroid 17-beta dehydrogenase 6 | 1.09 | 0.03104806 |
| *IFI30* | IFI30 lysosomal thiol reductase | 1.08 | 0.007553361 |
| *CNIH3* | cornichon family AMPA receptor auxiliary protein 3 | 1.08 | 0.026170681 |
| *ITIH5* | inter-alpha-trypsin inhibitor heavy chain 5 | 1.07 | 0.032877012 |
| *TENM4* | teneurin transmembrane protein 4 | 1.07 | 0.006670827 |
| *JAG2* | jagged canonical Notch ligand 2 | 1.06 | 0.018880928 |
| *COL8A2* | collagen type VIII alpha 2 chain | 1.06 | 0.000931703 |
| *RUBCNL* | rubicon like autophagy enhancer | 1.04 | 0.018550658 |
| *EPB41* | erythrocyte membrane protein band 4.1 | 1.03 | 0.004416376 |
| *RALGPS1* | Ral GEF with PH domain and SH3 binding motif 1 | 1.02 | 0.011726318 |
| *GPC4* | glypican 4 | 1.02 | 0.006224509 |
| *GPR153* | G protein-coupled receptor 153 | 1.02 | 9.22297E-08 |
| *STAT4* | signal transducer and activator of transcription 4 | 1.01 | 0.004333457 |
| *NHS* | NHS actin remodeling regulator | 1.00 | 0.0254592 |
| *GPC1* | glypican 1 | 0.99 | 1.74E-04 |
| *KIAA1549L* | KIAA1549 like | 0.99 | 0.001193359 |
| *NOCT* | nocturnin | 0.99 | 0.004333457 |
| *SEL1L3* | SEL1L family member 3 | 0.98 | 0.013772341 |
| *PER3* | period circadian regulator 3 | 0.98 | 0.019361196 |
| *CA5B* | carbonic anhydrase 5B | 0.97 | 0.047981213 |
| *GXYLT2* | glucoside xylosyltransferase 2 | 0.97 | 1.89E-02 |
| *FHL1* | four and a half LIM domains 1 | 0.97 | 0.000341183 |
| *ARNTL2* | aryl hydrocarbon receptor nuclear translocator like 2 | 0.96 | 0.020946553 |
| *FNIP2* | folliculin interacting protein 2 | 0.95 | 0.027764502 |
| *BANK1* | B cell scaffold protein with ankyrin repeats 1 | 0.94 | 0.023973182 |
| *CSAD* | cysteine sulfinic acid decarboxylase | 0.94 | 0.039509392 |
| *CHN2* | chimerin 2 | 0.94 | 0.027468375 |
| *GUCY1A2* | guanylate cyclase 1 soluble subunit alpha 2 | 0.94 | 0.005669642 |
| *LACC1* | laccase domain containing 1 | 0.94 | 2.62E-02 |
| *PHLDA1* | pleckstrin homology like domain family A member 1 | 0.93 | 0.023973182 |
| *SLC19A1* | solute carrier family 19 member 1 | 0.93 | 0.00114516 |
| *SEMA6D* | semaphorin 6D | 0.92 | 0.006948144 |
| *IL20RA* | interleukin 20 receptor subunit alpha | 0.91 | 1.87E-02 |
| *ACAA2* | acetyl-CoA acyltransferase 2 | 0.90 | 4.73E-04 |
| *MYO1B* | myosin IB | 0.89 | 0.002057379 |
| *MYEF2* | myelin expression factor 2 | 0.89 | 3.22E-02 |
| *PER2* | period circadian regulator 2 | 0.89 | 3.93E-02 |
| *GLIS2* | GLIS family zinc finger 2 | 0.88 | 2.62E-05 |
| *TRIM6* | tripartite motif containing 6 | 0.88 | 2.95E-02 |
| *BHLHE41* | basic helix-loop-helix family member e41 | 0.87 | 4.58E-02 |
| *QRICH2* | glutamine rich 2 | 0.87 | 2.53E-02 |
| *FAM227A* | family with sequence similarity 227 member A | 0.86 | 2.74E-02 |
| *PIK3R2* | phosphoinositide-3-kinase regulatory subunit 2 | 0.85 | 8.82E-05 |
| *AKNA* | AT-hook transcription factor | 0.84 | 9.90E-03 |
| *NR1D2* | nuclear receptor subfamily 1 group D member 2 | 0.84 | 5.28E-04 |
| *NUDT14* | nudix hydrolase 14 | 0.84 | 0.027391618 |
| *DTX4* | deltex E3 ubiquitin ligase 4 | 0.84 | 3.50E-02 |
| *MOCOS* | molybdenum cofactor sulfurase | 0.84 | 0.023862149 |
| *ASPHD2* | aspartate beta-hydroxylase domain containing 2 | 0.83 | 0.019396186 |
| *AK4* | adenylate kinase 4 | 0.83 | 1.56E-02 |
| *NCS1* | neuronal calcium sensor 1 | 0.83 | 6.95E-06 |
| *SLC6A9* | solute carrier family 6 member 9 | 0.82 | 3.08E-02 |
| *ITGA4* | integrin subunit alpha 4 | 0.82 | 3.48E-02 |
| *PRRX2* | paired related homeobox 2 | 0.82 | 3.46E-02 |
| *PPIP5K1* | diphosphoinositol pentakisphosphate kinase 1 | 0.82 | 0.024812449 |
| *UHRF1BP1* | UHRF1 binding protein 1 | 0.81 | 4.89E-02 |
| *DOK5* | docking protein 5 | 0.81 | 4.37E-04 |
| *LIMS1* | LIM zinc finger domain containing 1 | 0.80 | 0.000707977 |
| *APOL6* | apolipoprotein L6 | 0.79 | 4.63E-02 |
| *GTPBP2* | GTP binding protein 2 | 0.79 | 0.048615779 |
| *CCSAP* | centriole, cilia and spindle associated protein | 0.79 | 0.032119771 |
| *THY1* | Thy-1 cell surface antigen | 0.78 | 0.018245584 |
| *RGS3* | regulator of G protein signaling 3 | 0.77 | 0.015624435 |
| *SHB* | SH2 domain containing adaptor protein B | 0.77 | 0.048563756 |
| *PWWP2B* | PWWP domain containing 2B | 0.77 | 0.008943036 |
| *EGR2* | early growth response 2 | 0.76 | 2.80E-02 |
| *MLYCD* | malonyl-CoA decarboxylase | 0.76 | 1.89E-02 |
| *MFSD9* | major facilitator superfamily domain containing 9 | 0.76 | 0.04886069 |
| *COL27A1* | collagen type XXVII alpha 1 chain | 0.76 | 0.015624435 |
| *ATP8B1* | ATPase phospholipid transporting 8B1 | 0.75 | 0.017260247 |
| *TET3* | tet methylcytosine dioxygenase 3 | 0.75 | 4.71E-02 |
| *MET* | MET proto-oncogene, receptor tyrosine kinase | 0.74 | 0.038557109 |
| *XPOT* | exportin for tRNA | 0.74 | 0.037268889 |
| *RBM38* | RNA binding motif protein 38 | 0.73 | 0.035043311 |
| *ALG9* | ALG9 alpha-1,2-mannosyltransferase | 0.73 | 4.84E-02 |
| *SDC3* | syndecan 3 | 0.72 | 0.011536489 |
| *CACNB1* | calcium voltage-gated channel auxiliary subunit beta 1 | 0.72 | 0.011540997 |
| *ZBTB16* | zinc finger and BTB domain containing 16 | -4.38 | 1.14018E-55 |
| *TIMP4* | TIMP metallopeptidase inhibitor 4 | -2.34 | 3.23663E-08 |
| *FKBP5* | FKBP prolyl isomerase 5 | -2.24 | 2.27E-08 |
| *SAA1* | serum amyloid A1 | -2.22 | 3.3072E-07 |
| *PER1* | period circadian regulator 1 | -2.18 | 4.99E-15 |
| *MMP28* | matrix metallopeptidase 28 | -2.11 | 8.02647E-09 |
| *INHBB* | inhibin subunit beta B | -2.04 | 9.22E-08 |
| *GABRA5* | gamma-aminobutyric acid type A receptor subunit alpha5 | -1.97 | 8.87E-06 |
| *ANGPTL8* | angiopoietin like 8 | -1.89 | 3.71154E-05 |
| *APCDD1* | APC down-regulated 1 | -1.86 | 2.3894E-12 |
| *ATP1A2* | ATPase Na+/K+ transporting subunit alpha 2 | -1.81 | 0.000106102 |
| *DPT* | dermatopontin | -1.78 | 8.57318E-06 |
| *TMPRSS5* | transmembrane serine protease 5 | -1.77 | 8.57318E-06 |
| *ABCC2* | ATP binding cassette subfamily C member 2 | -1.76 | 1.74E-04 |
| *PTGS1* | prostaglandin-endoperoxide synthase 1 | -1.73 | 4.79878E-13 |
| *CRLF1* | cytokine receptor like factor 1 | -1.70 | 3.92E-07 |
| *LRP1B* | LDL receptor related protein 1B | -1.70 | 0.000341183 |
| *MAOA* | monoamine oxidase A | -1.69 | 0.000174045 |
| *CRISPLD2* | cysteine rich secretory protein LCCL domain containing 2 | -1.64 | 2.38623E-05 |
| *SLC16A12* | solute carrier family 16 member 12 | -1.63 | 0.00091505 |
| *TENT5B* | terminal nucleotidyltransferase 5B | -1.61 | 6.86903E-06 |
| *CPM* | carboxypeptidase M | -1.60 | 3.67898E-05 |
| *LMO3* | LIM domain only 3 | -1.58 | 0.000144809 |
| *PILRA* | paired immunoglobin like type 2 receptor alpha | -1.57 | 0.001492983 |
| *ACKR2* | atypical chemokine receptor 2 | -1.57 | 1.27998E-05 |
| *GALNT15* | polypeptide N-acetylgalactosaminyltransferase 15 | -1.55 | 0.002078686 |
| *NEGR1* | neuronal growth regulator 1 | -1.54 | 1.71964E-07 |
| *AVPR1A* | arginine vasopressin receptor 1A | -1.51 | 0.003277674 |
| *SYN2* | synapsin II | -1.49 | 0.003741136 |
| *NKD2* | NKD inhibitor of WNT signaling pathway 2 | -1.48 | 0.000751398 |
| *TMC2* | transmembrane channel like 2 | -1.47 | 0.004416376 |
| *STC1* | stanniocalcin 1 | -1.46 | 0.004329215 |
| *TF* | transferrin | -1.45 | 5.65E-04 |
| *METTL7A* | methyltransferase like 7A | -1.44 | 0.001193359 |
| *HIF3A* | hypoxia inducible factor 3 subunit alpha | -1.41 | 0.004567973 |
| *NA* | NA | -1.41 | 0.007455214 |
| *SERPINA3* | serpin family A member 3 | -1.40 | 0.000242257 |
| *C6* | complement C6 | -1.40 | 0.006601815 |
| *TSC22D3* | TSC22 domain family member 3 | -1.40 | 1.42408E-09 |
| *GLYAT* | glycine-N-acyltransferase | -1.39 | 0.009462246 |
| *RASL11A* | RAS like family 11 member A | -1.38 | 1.19E-03 |
| *GSTA1* | glutathione S-transferase alpha 1 | -1.36 | 1.16E-02 |
| *MGP* | matrix Gla protein | -1.34 | 0.014510646 |
| *HPD* | 4-hydroxyphenylpyruvate dioxygenase | -1.34 | 0.014492172 |
| *CLCN1* | chloride voltage-gated channel 1 | -1.32 | 0.018198762 |
| *CYP8B1* | cytochrome P450 family 8 subfamily B member 1 | -1.31 | 0.00622792 |
| *PKD2L1* | polycystin 2 like 1, transient receptor potential cation channel | -1.31 | 0.018346649 |
| *ACSL6* | acyl-CoA synthetase long chain family member 6 | -1.30 | 0.02049558 |
| *IP6K3* | inositol hexakisphosphate kinase 3 | -1.30 | 0.016867757 |
| *HSPA6* | heat shock protein family A (Hsp70) member 6 | -1.28 | 0.018861605 |
| *ISM1* | isthmin 1 | -1.28 | 0.022052525 |
| *MAP2K6* | mitogen-activated protein kinase kinase 6 | -1.28 | 0.024547624 |
| *HS3ST2* | heparan sulfate-glucosamine 3-sulfotransferase 2 | -1.27 | 0.024547624 |
| *AACS* | acetoacetyl-CoA synthetase | -1.26 | 4.33E-03 |
| *ARHGEF16* | Rho guanine nucleotide exchange factor 16 | -1.25 | 0.026445094 |
| *CST3* | cystatin C | -1.24 | 0.001901231 |
| *ANGPTL1* | angiopoietin like 1 | -1.23 | 0.018936049 |
| *ALS2CL* | ALS2 C-terminal like | -1.23 | 0.005588454 |
| *PLCH1* | phospholipase C eta 1 | -1.23 | 0.03625776 |
| *GLUL* | glutamate-ammonia ligase | -1.22 | 0.007824085 |
| *DNASE1L3* | deoxyribonuclease 1 like 3 | -1.21 | 0.020704394 |
| *RXFP1* | relaxin family peptide receptor 1 | -1.20 | 0.044001175 |
| *FMO2* | flavin containing dimethylaniline monoxygenase 2 | -1.20 | 0.034567002 |
| *MT1X* | metallothionein 1X | -1.19 | 0.013807091 |
| *SLC2A13* | solute carrier family 2 member 13 | -1.18 | 0.034752967 |
| *IGFBP2* | insulin like growth factor binding protein 2 | -1.17 | 0.04674927 |
| *TRNP1* | TMF1 regulated nuclear protein 1 | -1.16 | 3.02E-07 |
| *KCNK5* | potassium two pore domain channel subfamily K member 5 | -1.14 | 0.047144109 |
| *CYP4B1* | cytochrome P450 family 4 subfamily B member 1 | -1.14 | 0.029373766 |
| *CUTC* | cutC copper transporter | -1.14 | 5.36E-05 |
| *WNT5A* | Wnt family member 5A | -1.12 | 0.03478741 |
| *CTHRC1* | collagen triple helix repeat containing 1 | -1.10 | 0.03070775 |
| *ELANE* | elastase, neutrophil expressed | -1.10 | 0.019245127 |
| *C1QTNF7* | C1q and TNF related 7 | -1.10 | 0.015274773 |
| *ABLIM3* | actin binding LIM protein family member 3 | -1.09 | 0.046759343 |
| *CORO6* | coronin 6 | -1.03 | 0.018861605 |
| *DUSP4* | dual specificity phosphatase 4 | -1.01 | 3.14E-03 |
| *SMOC2* | SPARC related modular calcium binding 2 | -1.01 | 5.95E-03 |
| *KLF9* | Kruppel like factor 9 | -1.00 | 0.005864639 |
| *SPARCL1* | SPARC like 1 | -1.00 | 0.032877012 |
| *HRCT1* | histidine rich carboxyl terminus 1 | -1.00 | 0.016531751 |
| *RGMA* | repulsive guidance molecule BMP co-receptor a | -0.99 | 0.013679865 |
| *GSN* | gelsolin | -0.98 | 0.037068588 |
| *GPSM2* | G protein signaling modulator 2 | -0.97 | 0.02150243 |
| *ZNF395* | zinc finger protein 395 | -0.96 | 8.95E-08 |
| *SMARCD2* | SWI/SNF related, matrix associated, actin dependent regulator of chromatin, subfamily d, member 2 | -0.96 | 0.000215617 |
| *TMEM59L* | transmembrane protein 59 like | -0.96 | 0.012986163 |
| *HLX* | H2.0 like homeobox | -0.94 | 1.74E-04 |
| *TWF2* | twinfilin actin binding protein 2 | -0.89 | 4.48E-03 |
| *ERRFI1* | ERBB receptor feedback inhibitor 1 | -0.89 | 0.044614151 |
| *DUSP1* | dual specificity phosphatase 1 | -0.85 | 0.002303644 |
| *HMGN5* | high mobility group nucleosome binding domain 5 | -0.82 | 0.025975231 |
| *ADAMTS1* | ADAM metallopeptidase with thrombospondin type 1 motif 1 | -0.77 | 1.03E-02 |
| *FAM43A* | family with sequence similarity 43 member A | -0.73 | 1.82E-02 |
| *GAS1* | growth arrest specific 1 | -0.73 | 0.039012627 |

**Supplementary Table 8.** DEGs from comparison of active beige and white adipocytes carrying FTO obesity-risk genotype; n=4 of each genotype

| **Symbol** | **Gene Name** | **Log2 Fold Change** | **Adj. P value** |
| --- | --- | --- | --- |
| *CPA4* | carboxypeptidase A4 | 2.21 | 6.62E-07 |
| *LAMP3* | lysosomal associated membrane protein 3 | 1.89 | 1.61E-04 |
| *GAP43* | growth associated protein 43 | 1.85 | 3.30E-04 |
| *FNDC1* | fibronectin type III domain containing 1 | 1.81 | 1.59E-04 |
| *SLC24A2* | solute carrier family 24 member 2 | 1.76 | 3.70E-04 |
| *MAP3K7CL* | MAP3K7 C-terminal like | 1.76 | 2.29E-07 |
| *C1QTNF3* | C1q and TNF related 3 | 1.69 | 1.93E-03 |
| *KRT79* | keratin 79 | 1.67 | 1.19E-03 |
| *THBD* | thrombomodulin | 1.61 | 4.84E-04 |
| *CEMIP* | cell migration inducing hyaluronidase 1 | 1.60 | 2.48E-04 |
| *CTXN1* | cortexin 1 | 1.58 | 0.001179796 |
| *RSPO3* | R-spondin 3 | 1.54 | 4.53E-03 |
| *PRAG1* | PEAK1 related, kinase-activating pseudokinase 1 | 1.53 | 0.000129348 |
| *KCNA1* | potassium voltage-gated channel subfamily A member 1 | 1.52 | 7.22E-03 |
| *KRT16* | keratin 16 | 1.51 | 1.84E-03 |
| *PCK1* | phosphoenolpyruvate carboxykinase 1 | 1.48 | 8.96E-03 |
| *TENT5C* | terminal nucleotidyltransferase 5C | 1.47 | 1.01E-02 |
| *CD96* | CD96 molecule | 1.47 | 1.32E-02 |
| *MEST* | mesoderm specific transcript | 1.45 | 0.000112085 |
| *MYL4* | myosin light chain 4 | 1.44 | 7.86E-03 |
| *CSDC2* | cold shock domain containing C2 | 1.43 | 0.000134369 |
| *AQP3* | aquaporin 3 (Gill blood group) | 1.43 | 1.14E-02 |
| *STAC* | SH3 and cysteine rich domain | 1.43 | 1.67558E-05 |
| *ZNF365* | zinc finger protein 365 | 1.39 | 4.32936E-05 |
| *TAGAP* | T cell activation RhoGTPase activating protein | 1.38 | 0.029446682 |
| *PM20D1* | peptidase M20 domain containing 1 | 1.36 | 0.032278284 |
| *PPP1R14C* | protein phosphatase 1 regulatory inhibitor subunit 14C | 1.34 | 4.18E-02 |
| *KIRREL3* | kirre like nephrin family adhesion molecule 3 | 1.34 | 2.45E-02 |
| *KCNK15* | potassium two pore domain channel subfamily K member 15 | 1.31 | 0.014097184 |
| *KCNMA1* | potassium calcium-activated channel subfamily M alpha 1 | 1.28 | 2.97E-02 |
| *RTKN2* | rhotekin 2 | 1.25 | 0.007842491 |
| *RBM24* | RNA binding motif protein 24 | 1.21 | 1.93E-07 |
| *SLITRK6* | SLIT and NTRK like family member 6 | 1.20 | 0.046666701 |
| *TNFAIP6* | TNF alpha induced protein 6 | 1.17 | 1.66E-02 |
| *LINGO1* | leucine rich repeat and Ig domain containing 1 | 1.17 | 0.027520144 |
| *CIART* | circadian associated repressor of transcription | 1.16 | 1.35919E-05 |
| *LINC00856* | long intergenic non-protein coding RNA 856 | 1.16 | 0.042053483 |
| *NDUFA4L2* | NDUFA4 mitochondrial complex associated like 2 | 1.15 | 1.06E-02 |
| *NA* | NA | 1.12 | 1.12E-04 |
| *APLP1* | amyloid beta precursor like protein 1 | 1.09 | 0.01078143 |
| *FUCA1* | alpha-L-fucosidase 1 | 1.09 | 8.13092E-05 |
| *DOK5* | docking protein 5 | 1.07 | 9.45044E-05 |
| *CYS1* | cystin 1 | 1.07 | 0.024443729 |
| *EPB41L4B* | erythrocyte membrane protein band 4.1 like 4B | 1.05 | 0.042053483 |
| *KCNG1* | potassium voltage-gated channel modifier subfamily G member 1 | 1.00 | 1.48E-02 |
| *SSC5D* | scavenger receptor cysteine rich family member with 5 domains | 0.99 | 2.45E-02 |
| *RCAN1* | regulator of calcineurin 1 | 0.99 | 0.00039172 |
| *TGM5* | transglutaminase 5 | 0.97 | 0.022767992 |
| *APBA2* | amyloid beta precursor protein binding family A member 2 | 0.94 | 1.22E-02 |
| *RNF122* | ring finger protein 122 | 0.91 | 1.53E-02 |
| *GALNT12* | polypeptide N-acetylgalactosaminyltransferase 12 | 0.88 | 0.00618527 |
| *GPC1* | glypican 1 | 0.87 | 0.019587135 |
| *STARD10* | StAR related lipid transfer domain containing 10 | 0.81 | 0.004855982 |
| *AMACR* | alpha-methylacyl-CoA racemase | 0.75 | 0.000368807 |
| *RFX2* | regulatory factor X2 | 0.71 | 0.027357964 |
| *ZBTB16* | zinc finger and BTB domain containing 16 | -4.95 | 3.4687E-100 |
| *HIF3A* | hypoxia inducible factor 3 subunit alpha | -3.26 | 4.89E-17 |
| *FKBP5* | FKBP prolyl isomerase 5 | -3.00 | 1.36855E-23 |
| *GALNT15* | polypeptide N-acetylgalactosaminyltransferase 15 | -2.96 | 1.42582E-21 |
| *GPX3* | glutathione peroxidase 3 | -2.72 | 3.01485E-14 |
| *GRIA1* | glutamate ionotropic receptor AMPA type subunit 1 | -2.60 | 1.03957E-26 |
| *CYP4B1* | cytochrome P450 family 4 subfamily B member 1 | -2.39 | 4.25677E-07 |
| *SLC16A12* | solute carrier family 16 member 12 | -2.39 | 1.83324E-07 |
| *C6* | complement C6 | -2.35 | 6.61625E-07 |
| *PER1* | period circadian regulator 1 | -2.31 | 1.22494E-22 |
| *PILRA* | paired immunoglobin like type 2 receptor alpha | -2.25 | 3.83627E-08 |
| *FMO2* | flavin containing dimethylaniline monoxygenase 2 | -2.18 | 2.55939E-06 |
| *GGT5* | gamma-glutamyltransferase 5 | -2.09 | 3.83627E-08 |
| *ABCC2* | ATP binding cassette subfamily C member 2 | -2.08 | 2.37257E-05 |
| *RAPGEF5* | Rap guanine nucleotide exchange factor 5 | -2.05 | 4.0043E-05 |
| *FGD4* | FYVE, RhoGEF and PH domain containing 4 | -2.05 | 3.46366E-08 |
| *MAOA* | monoamine oxidase A | -2.02 | 6.51851E-06 |
| *LRP1B* | LDL receptor related protein 1B | -1.99 | 8.24129E-05 |
| *METTL7A* | methyltransferase like 7A | -1.95 | 3.71531E-05 |
| *NEGR1* | neuronal growth regulator 1 | -1.91 | 1.33964E-11 |
| *TIMP4* | TIMP metallopeptidase inhibitor 4 | -1.87 | 0.000280383 |
| *LMO3* | LIM domain only 3 | -1.84 | 3.85E-06 |
| *F5* | coagulation factor V | -1.84 | 0.000416733 |
| *LEP* | leptin | -1.82 | 6.19839E-05 |
| *ALOX5AP* | arachidonate 5-lipoxygenase activating protein | -1.81 | 0.00048402 |
| *APCDD1* | APC down-regulated 1 | -1.80 | 1.67E-05 |
| *VIT* | vitrin | -1.78 | 2.65961E-13 |
| *PLXNA4* | plexin A4 | -1.78 | 4.29E-07 |
| *GLUL* | glutamate-ammonia ligase | -1.76 | 1.6253E-05 |
| *ANGPTL8* | angiopoietin like 8 | -1.75 | 0.000888082 |
| *ADH1A* | alcohol dehydrogenase 1A (class I), alpha polypeptide | -1.73 | 0.000242433 |
| *ADRA1B* | adrenoceptor alpha 1B | -1.72 | 2.63567E-06 |
| *SAA1* | serum amyloid A1 | -1.71 | 0.00138169 |
| *GPM6B* | glycoprotein M6B | -1.70 | 6.84565E-05 |
| *NKD2* | NKD inhibitor of WNT signaling pathway 2 | -1.70 | 0.001733466 |
| *CPM* | carboxypeptidase M | -1.66 | 0.003080267 |
| *EPHB6* | EPH receptor B6 | -1.65 | 0.000471449 |
| *HS3ST2* | heparan sulfate-glucosamine 3-sulfotransferase 2 | -1.65 | 3.16E-03 |
| *RASL11A* | RAS like family 11 member A | -1.65 | 0.000471449 |
| *INHBB* | inhibin subunit beta B | -1.64 | 0.000567616 |
| *CRISPLD2* | cysteine rich secretory protein LCCL domain containing 2 | -1.63 | 9.97296E-05 |
| *NA* | NA | -1.62 | 4.21E-03 |
| *PRODH* | proline dehydrogenase 1 | -1.60 | 0.004211143 |
| *APOB* | apolipoprotein B | -1.60 | 0.004638876 |
| *SCARA5* | scavenger receptor class A member 5 | -1.59 | 0.004527457 |
| *DPEP1* | dipeptidase 1 | -1.58 | 0.006228468 |
| *DAAM2-AS1* | DAAM2 antisense RNA 1 | -1.57 | 2.28E-03 |
| *MAOB* | monoamine oxidase B | -1.56 | 5.34E-03 |
| *RGCC* | regulator of cell cycle | -1.56 | 0.006255759 |
| *KIAA0040* | KIAA0040 | -1.56 | 6.83E-03 |
| *TMPRSS5* | transmembrane serine protease 5 | -1.55 | 0.006074323 |
| *LRRN3* | leucine rich repeat neuronal 3 | -1.55 | 0.003577777 |
| *TMC2* | transmembrane channel like 2 | -1.53 | 0.007842491 |
| *ALS2CL* | ALS2 C-terminal like | -1.48 | 0.011813178 |
| *COL4A6* | collagen type IV alpha 6 chain | -1.48 | 0.011623143 |
| *CD34* | CD34 molecule | -1.48 | 0.012930564 |
| *GDF7* | growth differentiation factor 7 | -1.48 | 0.002574005 |
| *PTPN22* | protein tyrosine phosphatase non-receptor type 22 | -1.46 | 0.015300372 |
| *GUCY1A1* | guanylate cyclase 1 soluble subunit alpha 1 | -1.46 | 6.84565E-05 |
| *STC1* | stanniocalcin 1 | -1.46 | 0.016475532 |
| *LINC01088* | long intergenic non-protein coding RNA 1088 | -1.46 | 0.011477841 |
| *NA* | NA | -1.45 | 0.017347738 |
| *RIPOR3* | RIPOR family member 3 | -1.45 | 0.017043932 |
| *ANGPTL1* | angiopoietin like 1 | -1.44 | 0.000553976 |
| *AZGP1* | alpha-2-glycoprotein 1, zinc-binding | -1.44 | 0.018535439 |
| *LINC00482* | long intergenic non-protein coding RNA 482 | -1.44 | 0.016475532 |
| *APOD* | apolipoprotein D | -1.44 | 0.019587135 |
| *TMEM150C* | transmembrane protein 150C | -1.43 | 0.011354892 |
| *PKD2L1* | polycystin 2 like 1, transient receptor potential cation channel | -1.42 | 0.016475532 |
| *TSC22D3* | TSC22 domain family member 3 | -1.40 | 3.77338E-08 |
| *POM121L9P* | POM121 transmembrane nucleoporin like 9, pseudogene | -1.39 | 0.006228468 |
| *ADH1B* | alcohol dehydrogenase 1B (class I), beta polypeptide | -1.39 | 0.015862261 |
| *MRO* | maestro | -1.37 | 0.033330958 |
| *GUCY1B1* | guanylate cyclase 1 soluble subunit beta 1 | -1.36 | 0.000327154 |
| *CILP* | cartilage intermediate layer protein | -1.34 | 0.03989726 |
| *POU3F3* | POU class 3 homeobox 3 | -1.34 | 0.029446682 |
| *FAM166B* | family with sequence similarity 166 member B | -1.34 | 0.042868397 |
| *SMCO3* | single-pass membrane protein with coiled-coil domains 3 | -1.33 | 0.018465442 |
| *SERPINA3* | serpin family A member 3 | -1.32 | 0.046666701 |
| *NRCAM* | neuronal cell adhesion molecule | -1.29 | 0.026482246 |
| *SLC34A2* | solute carrier family 34 member 2 | -1.27 | 0.049483648 |
| *PRELP* | proline and arginine rich end leucine rich repeat protein | -1.26 | 3.80272E-05 |
| *WASF3* | WASP family member 3 | -1.26 | 3.57256E-14 |
| *RASSF4* | Ras association domain family member 4 | -1.26 | 0.015366962 |
| *ADARB1* | adenosine deaminase RNA specific B1 | -1.26 | 0.000183071 |
| *NA* | NA | -1.25 | 0.033654555 |
| *MGP* | matrix Gla protein | -1.25 | 0.024534915 |
| *DHRS3* | dehydrogenase/reductase 3 | -1.23 | 0.003152659 |
| *MT1X* | metallothionein 1X | -1.17 | 0.012510803 |
| *BOC* | BOC cell adhesion associated, oncogene regulated | -1.17 | 0.005972864 |
| *KLF9* | Kruppel like factor 9 | -1.17 | 1.0158E-06 |
| *SIM1* | SIM bHLH transcription factor 1 | -1.16 | 0.046781488 |
| *CFD* | complement factor D | -1.15 | 0.002412682 |
| *ERRFI1* | ERBB receptor feedback inhibitor 1 | -1.14 | 0.000247582 |
| *RGMA* | repulsive guidance molecule BMP co-receptor a | -1.13 | 0.004979066 |
| *TENT5B* | terminal nucleotidyltransferase 5B | -1.12 | 0.015300372 |
| *IRS1* | insulin receptor substrate 1 | -1.11 | 0.002530607 |
| *CLCN4* | chloride voltage-gated channel 4 | -1.11 | 0.000108217 |
| *SSH2* | slingshot protein phosphatase 2 | -1.08 | 0.000160562 |
| *CST3* | cystatin C | -1.08 | 0.004211143 |
| *GREB1L* | GREB1 like retinoic acid receptor coactivator | -1.06 | 0.015300372 |
| *RNASE4* | ribonuclease A family member 4 | -1.04 | 1.67319E-05 |
| *NID1* | nidogen 1 | -1.04 | 5.48378E-06 |
| *COL5A3* | collagen type V alpha 3 chain | -1.03 | 0.020208861 |
| *TGFBR2* | transforming growth factor beta receptor 2 | -1.02 | 3.77338E-08 |
| *WNT11* | Wnt family member 11 | -1.01 | 0.015862261 |
| *SOX13* | SRY-box transcription factor 13 | -1.00 | 3.80152E-05 |
| *ZNF395* | zinc finger protein 395 | -1.00 | 0.020208861 |
| *TNS2* | tensin 2 | -1.00 | 0.000678684 |
| *CUTC* | cutC copper transporter | -0.98 | 7.37E-07 |
| *DSEL* | dermatan sulfate epimerase like | -0.97 | 0.027576633 |
| *ALDH16A1* | aldehyde dehydrogenase 16 family member A1 | -0.96 | 0.009618862 |
| *CXCL12* | C-X-C motif chemokine ligand 12 | -0.96 | 2.22858E-05 |
| *TLR4* | toll like receptor 4 | -0.94 | 0.004438033 |
| *CHST2* | carbohydrate sulfotransferase 2 | -0.93 | 0.027979782 |
| *TACC1* | transforming acidic coiled-coil containing protein 1 | -0.92 | 3.74E-03 |
| *SMARCD2* | SWI/SNF related, matrix associated, actin dependent regulator of chromatin, subfamily d, member 2 | -0.90 | 0.00039172 |
| *JADE2* | jade family PHD finger 2 | -0.90 | 0.040374979 |
| *HIPK2* | homeodomain interacting protein kinase 2 | -0.90 | 0.011742751 |
| *ITPR1* | inositol 1,4,5-trisphosphate receptor type 1 | -0.90 | 0.030465421 |
| *ANG* | angiogenin | -0.88 | 0.040374979 |
| *ZNF438* | zinc finger protein 438 | -0.85 | 0.036550321 |
| *MINDY2* | MINDY lysine 48 deubiquitinase 2 | -0.84 | 0.009618862 |
| *HLX* | H2.0 like homeobox | -0.83 | 7.46E-03 |
| *CAT* | catalase | -0.82 | 0.029463934 |
| *TTPAL* | alpha tocopherol transfer protein like | -0.81 | 0.006334513 |
| *DNAJC6* | DnaJ heat shock protein family (Hsp40) member C6 | -0.81 | 0.046666701 |
| *CFLAR* | CASP8 and FADD like apoptosis regulator | -0.79 | 4.86E-03 |
| *FOXO1* | forkhead box O1 | -0.78 | 9.70E-03 |
| *FOXO3* | forkhead box O3 | -0.77 | 9.45044E-05 |
| *FZD4* | frizzled class receptor 4 | -0.76 | 4.12E-02 |
| *PTK2B* | protein tyrosine kinase 2 beta | -0.75 | 6.26E-03 |

**Supplementary Table 9.** DEGs from comparison of active beige and inactive beige adipocytes carrying FTO risk-free genotype; n=4 of each genotype

| **Symbol** | **Gene Name** | **Log2 Fold Change** | **Adj. P value** |
| --- | --- | --- | --- |
| *PCK1* | phosphoenolpyruvate carboxykinase 1 | 2.41 | 1.04E-15 |
| *CPA4* | carboxypeptidase A4 | 2.32 | 1.65E-14 |
| *SCN4A* | sodium voltage-gated channel alpha subunit 4 | 2.20 | 4.18E-11 |
| *KRT79* | keratin 79 | 2.14 | 2.08E-10 |
| *SLC22A12* | solute carrier family 22 member 12 | 1.99 | 7.43E-09 |
| *NA* | NA | 1.92 | 1.18E-08 |
| *BBOX1* | gamma-butyrobetaine hydroxylase 1 | 1.91 | 7.73E-10 |
| *ADAMTS18* | ADAM metallopeptidase with thrombospondin type 1 motif 18 | 1.77 | 4.53E-07 |
| *FCN1* | ficolin 1 | 1.77 | 5.43E-07 |
| *TRPM8* | transient receptor potential cation channel subfamily M member 8 | 1.66 | 4.26E-06 |
| *SLC22A3* | solute carrier family 22 member 3 | 1.63 | 2.57558E-08 |
| *PPP1R1A* | protein phosphatase 1 regulatory inhibitor subunit 1A | 1.63 | 1.70E-08 |
| *CITED1* | Cbp/p300 interacting transactivator with Glu/Asp rich carboxy-terminal domain 1 | 1.62 | 3.88183E-07 |
| *FABP4* | fatty acid binding protein 4 | 1.59 | 5.18E-09 |
| *PDE1B* | phosphodiesterase 1B | 1.56 | 4.79E-08 |
| *AP3B2* | adaptor related protein complex 3 subunit beta 2 | 1.56 | 4.37E-12 |
| *SORL1* | sortilin related receptor 1 | 1.55 | 2.83E-05 |
| *AQP3* | aquaporin 3 (Gill blood group) | 1.54 | 2.55E-05 |
| *GK* | glycerol kinase | 1.54 | 7.39062E-10 |
| *IL1B* | interleukin 1 beta | 1.50 | 1.70E-05 |
| *CD52* | CD52 molecule | 1.49 | 7.22291E-05 |
| *LPL* | lipoprotein lipase | 1.49 | 1.54E-06 |
| *CLDN2* | claudin 2 | 1.47 | 7.157E-05 |
| *KCNA1* | potassium voltage-gated channel subfamily A member 1 | 1.46 | 6.87598E-05 |
| *CTXN1* | cortexin 1 | 1.45 | 1.22527E-07 |
| *PLEKHG6* | pleckstrin homology and RhoGEF domain containing G6 | 1.44 | 3.88183E-07 |
| *PLIN5* | perilipin 5 | 1.41 | 6.00E-05 |
| *KIRREL3* | kirre like nephrin family adhesion molecule 3 | 1.40 | 6.11E-05 |
| *PM20D1* | peptidase M20 domain containing 1 | 1.39 | 0.000156088 |
| *CYP4F12* | cytochrome P450 family 4 subfamily F member 12 | 1.37 | 2.10E-05 |
| *KCNK12* | potassium two pore domain channel subfamily K member 12 | 1.37 | 0.000368849 |
| *LHCGR* | luteinizing hormone/choriogonadotropin receptor | 1.37 | 1.68E-04 |
| *ANO5* | anoctamin 5 | 1.36 | 0.000205831 |
| *ADIPOQ* | adiponectin, C1Q and collagen domain containing | 1.34 | 1.98E-04 |
| *LINC02554* | long intergenic non-protein coding RNA 2554 | 1.33 | 0.000503395 |
| *TMEM132C* | transmembrane protein 132C | 1.33 | 0.000234679 |
| *TSHR* | thyroid stimulating hormone receptor | 1.33 | 0.000613382 |
| *CD96* | CD96 molecule | 1.32 | 6.09E-04 |
| *C1QTNF3* | C1q and TNF related 3 | 1.32 | 5.87E-04 |
| *ADAM12* | ADAM metallopeptidase domain 12 | 1.30 | 0.000126762 |
| *CASZ1* | castor zinc finger 1 | 1.29 | 0.001217157 |
| *LUCAT1* | lung cancer associated transcript 1 | 1.28 | 0.001332685 |
| *STX11* | syntaxin 11 | 1.28 | 1.23367E-05 |
| *TRHDE-AS1* | TRHDE antisense RNA 1 | 1.27 | 3.22087E-10 |
| *ABCG1* | ATP binding cassette subfamily G member 1 | 1.27 | 5.95E-06 |
| *EPB41L4B* | erythrocyte membrane protein band 4.1 like 4B | 1.25 | 4.94E-04 |
| *TMEM200C* | transmembrane protein 200C | 1.24 | 0.001474214 |
| *THBD* | thrombomodulin | 1.24 | 0.001938233 |
| *MOGAT1* | monoacylglycerol O-acyltransferase 1 | 1.21 | 3.13E-03 |
| *MAP3K7CL* | MAP3K7 C-terminal like | 1.21 | 6.11E-05 |
| *FNDC1* | fibronectin type III domain containing 1 | 1.21 | 0.00336912 |
| *SLCO2A1* | solute carrier organic anion transporter family member 2A1 | 1.19 | 0.003487693 |
| *LRRC15* | leucine rich repeat containing 15 | 1.19 | 0.00418377 |
| *RUBCNL* | rubicon like autophagy enhancer | 1.18 | 0.000440607 |
| *PCSK1* | proprotein convertase subtilisin/kexin type 1 | 1.17 | 0.001533118 |
| *SCAMP5* | secretory carrier membrane protein 5 | 1.17 | 0.002084765 |
| *ICA1* | islet cell autoantigen 1 | 1.17 | 1.22E-03 |
| *RASD1* | ras related dexamethasone induced 1 | 1.15 | 1.23367E-05 |
| *NUDT14* | nudix hydrolase 14 | 1.14 | 8.99329E-06 |
| *GRAP* | GRB2 related adaptor protein | 1.14 | 0.005592092 |
| *TENT5C* | terminal nucleotidyltransferase 5C | 1.14 | 0.006357465 |
| *FGR* | FGR proto-oncogene, Src family tyrosine kinase | 1.13 | 6.11052E-05 |
| *ADGRB2* | adhesion G protein-coupled receptor B2 | 1.13 | 0.000831457 |
| *EGFLAM* | EGF like, fibronectin type III and laminin G domains | 1.13 | 0.000673902 |
| *MGAT3* | beta-1,4-mannosyl-glycoprotein 4-beta-N-acetylglucosaminyltransferase | 1.13 | 0.00056257 |
| *DLX3* | distal-less homeobox 3 | 1.13 | 0.008700818 |
| *TRHDE* | thyrotropin releasing hormone degrading enzyme | 1.12 | 0.000268661 |
| *RSPO3* | R-spondin 3 | 1.11 | 0.008700818 |
| *TSPAN15* | tetraspanin 15 | 1.11 | 0.004062811 |
| *FCHO1* | FCH and mu domain containing endocytic adaptor 1 | 1.10 | 0.001715175 |
| *EPB41* | erythrocyte membrane protein band 4.1 | 1.10 | 3.45134E-17 |
| *ADAMTS14* | ADAM metallopeptidase with thrombospondin type 1 motif 14 | 1.10 | 0.011720639 |
| *ECSCR* | endothelial cell surface expressed chemotaxis and apoptosis regulator | 1.09 | 0.010950504 |
| *CYS1* | cystin 1 | 1.09 | 0.001547479 |
| *AATBC* | apoptosis associated transcript in bladder cancer | 1.09 | 0.012342268 |
| *ACSM3* | acyl-CoA synthetase medium chain family member 3 | 1.08 | 0.009975763 |
| *PALMD* | palmdelphin | 1.08 | 3.49E-03 |
| *CMYA5* | cardiomyopathy associated 5 | 1.08 | 0.001618637 |
| *PREX1* | phosphatidylinositol-3,4,5-trisphosphate dependent Rac exchange factor 1 | 1.07 | 0.000241977 |
| *RBM24* | RNA binding motif protein 24 | 1.06 | 0.010697451 |
| *RTKN2* | rhotekin 2 | 1.06 | 1.05E-02 |
| *COL8A2* | collagen type VIII alpha 2 chain | 1.06 | 2.77185E-09 |
| *PER3* | period circadian regulator 3 | 1.06 | 3.85E-10 |
| *ITIH1* | inter-alpha-trypsin inhibitor heavy chain 1 | 1.05 | 0.013689471 |
| *PHLDA1* | pleckstrin homology like domain family A member 1 | 1.05 | 0.00147364 |
| *SV2A* | synaptic vesicle glycoprotein 2A | 1.04 | 0.019965933 |
| *PCDH19* | protocadherin 19 | 1.03 | 0.0159972 |
| *MEST* | mesoderm specific transcript | 1.03 | 0.005849882 |
| *CKMT1B* | creatine kinase, mitochondrial 1B | 1.03 | 0.022431637 |
| *SH2D3C* | SH2 domain containing 3C | 1.03 | 0.005279943 |
| *KRT14* | keratin 14 | 1.02 | 0.005819803 |
| *LMO2* | LIM domain only 2 | 1.02 | 0.008648955 |
| *PLIN4* | perilipin 4 | 1.02 | 1.92E-02 |
| *SRCIN1* | SRC kinase signaling inhibitor 1 | 1.01 | 0.011926948 |
| *IL4I1* | interleukin 4 induced 1 | 1.01 | 0.028950887 |
| *SLC19A3* | solute carrier family 19 member 3 | 1.00 | 0.00764458 |
| *ABCA3* | ATP binding cassette subfamily A member 3 | 1.00 | 1.36E-02 |
| *GXYLT2* | glucoside xylosyltransferase 2 | 0.99 | 0.000229046 |
| *CIART* | circadian associated repressor of transcription | 0.99 | 0.004139608 |
| *CKMT2* | creatine kinase, mitochondrial 2 | 0.99 | 0.002462438 |
| *RXRG* | retinoid X receptor gamma | 0.99 | 0.004055711 |
| *RGS7BP* | regulator of G protein signaling 7 binding protein | 0.98 | 5.90E-03 |
| *FBXO27* | F-box protein 27 | 0.98 | 8.39E-04 |
| *CIDEA* | cell death inducing DFFA like effector a | 0.98 | 0.032303887 |
| *APLP1* | amyloid beta precursor like protein 1 | 0.98 | 1.41E-04 |
| *NA* | NA | 0.98 | 0.028202928 |
| *CADM3* | cell adhesion molecule 3 | 0.98 | 0.028950887 |
| *RGS2* | regulator of G protein signaling 2 | 0.98 | 0.000229046 |
| *ASS1* | argininosuccinate synthase 1 | 0.97 | 0.000201889 |
| *MACROD2* | mono-ADP ribosylhydrolase 2 | 0.97 | 0.015219886 |
| *PLEKHA7* | pleckstrin homology domain containing A7 | 0.96 | 0.012153597 |
| *AQP7* | aquaporin 7 | 0.96 | 0.000388439 |
| *RIMS4* | regulating synaptic membrane exocytosis 4 | 0.96 | 0.039917984 |
| *DPYSL3* | dihydropyrimidinase like 3 | 0.96 | 0.000860395 |
| *LGI2* | leucine rich repeat LGI family member 2 | 0.96 | 0.041785315 |
| *FAM151A* | family with sequence similarity 151 member A | 0.96 | 0.036439624 |
| *C3orf80* | chromosome 3 open reading frame 80 | 0.95 | 0.045925757 |
| *PDZD2* | PDZ domain containing 2 | 0.95 | 0.032874973 |
| *FYB1* | FYN binding protein 1 | 0.95 | 0.001975791 |
| *PRG4* | proteoglycan 4 | 0.95 | 0.046393557 |
| *GPR153* | G protein-coupled receptor 153 | 0.94 | 1.47895E-09 |
| *LBP* | lipopolysaccharide binding protein | 0.94 | 0.033799174 |
| *RGL3* | ral guanine nucleotide dissociation stimulator like 3 | 0.94 | 0.029610558 |
| *DHCR7* | 7-dehydrocholesterol reductase | 0.93 | 3.88183E-07 |
| *GCOM1* | GRINL1A complex locus 1 | 0.93 | 0.00955761 |
| *SEL1L3* | SEL1L family member 3 | 0.93 | 0.015561115 |
| *SYNGR2* | synaptogyrin 2 | 0.93 | 0.004062811 |
| *PPM1H* | protein phosphatase, Mg2+/Mn2+ dependent 1H | 0.93 | 0.00122567 |
| *PLXDC1* | plexin domain containing 1 | 0.92 | 0.005849882 |
| *SSC5D* | scavenger receptor cysteine rich family member with 5 domains | 0.92 | 0.006853399 |
| *CA3* | carbonic anhydrase 3 | 0.92 | 0.044090769 |
| *HCAR3* | hydroxycarboxylic acid receptor 3 | 0.91 | 0.036923788 |
| *GPC1* | glypican 1 | 0.90 | 0.000395719 |
| *KIAA1549L* | KIAA1549 like | 0.89 | 0.001248166 |
| *TMEM131L* | transmembrane 131 like | 0.89 | 0.000592826 |
| *FLVCR2* | FLVCR heme transporter 2 | 0.89 | 0.043463848 |
| *MRAP* | melanocortin 2 receptor accessory protein | 0.88 | 0.012868285 |
| *TDRKH* | tudor and KH domain containing | 0.88 | 0.004519579 |
| *SAMD14* | sterile alpha motif domain containing 14 | 0.87 | 0.012941161 |
| *TENM4* | teneurin transmembrane protein 4 | 0.87 | 0.025884593 |
| *PTGER2* | prostaglandin E receptor 2 | 0.87 | 0.046393557 |
| *AFF2* | AF4/FMR2 family member 2 | 0.87 | 0.008077169 |
| *SLC19A1* | solute carrier family 19 member 1 | 0.86 | 6.93268E-05 |
| *ACAA2* | acetyl-CoA acyltransferase 2 | 0.86 | 0.000388058 |
| *NR3C2* | nuclear receptor subfamily 3 group C member 2 | 0.86 | 0.002004975 |
| *TTC9* | tetratricopeptide repeat domain 9 | 0.86 | 0.039296395 |
| *DOK5* | docking protein 5 | 0.85 | 1.39055E-05 |
| *DIRAS1* | DIRAS family GTPase 1 | 0.85 | 0.037709719 |
| *ASPHD2* | aspartate beta-hydroxylase domain containing 2 | 0.84 | 0.003345262 |
| *NR1D2* | nuclear receptor subfamily 1 group D member 2 | 0.84 | 5.04452E-12 |
| *FAR2* | fatty acyl-CoA reductase 2 | 0.83 | 0.021325265 |
| *DOCK10* | dedicator of cytokinesis 10 | 0.82 | 0.000727254 |
| *GUCY1A2* | guanylate cyclase 1 soluble subunit alpha 2 | 0.82 | 0.000319778 |
| *MKNK2* | MAPK interacting serine/threonine kinase 2 | 0.81 | 0.000759138 |
| *LACC1* | laccase domain containing 1 | 0.81 | 0.024633811 |
| *ACOT2* | acyl-CoA thioesterase 2 | 0.79 | 0.021010834 |
| *ATP8B1* | ATPase phospholipid transporting 8B1 | 0.78 | 1.23367E-05 |
| *MLYCD* | malonyl-CoA decarboxylase | 0.77 | 0.002234209 |
| *PPIP5K1* | diphosphoinositol pentakisphosphate kinase 1 | 0.76 | 0.002268177 |
| *NCS1* | neuronal calcium sensor 1 | 0.76 | 1.23367E-05 |
| *LAIR1* | leukocyte associated immunoglobulin like receptor 1 | 0.76 | 0.018875982 |
| *ANGPTL4* | angiopoietin like 4 | 0.76 | 0.02339336 |
| *L3MBTL2-AS1* | L3MBTL2 antisense RNA 1 | 0.76 | 0.040013166 |
| *CAMKK1* | calcium/calmodulin dependent protein kinase kinase 1 | 0.76 | 0.000696505 |
| *PTGDS* | prostaglandin D2 synthase | 0.75 | 9.57E-03 |
| *HILPDA* | hypoxia inducible lipid droplet associated | 0.75 | 0.001810421 |
| *LRBA* | LPS responsive beige-like anchor protein | 0.73 | 0.000130463 |
| *PIK3R2* | phosphoinositide-3-kinase regulatory subunit 2 | 0.73 | 0.000140823 |
| *ITGA4* | integrin subunit alpha 4 | 0.73 | 0.041203422 |
| *PEX11A* | peroxisomal biogenesis factor 11 alpha | 0.71 | 0.036796195 |
| *SHB* | SH2 domain containing adaptor protein B | 0.71 | 3.64E-02 |
| *ORAI2* | ORAI calcium release-activated calcium modulator 2 | 0.70 | 0.027435891 |
| *ZBTB16* | zinc finger and BTB domain containing 16 | -3.87 | 6.25789E-60 |
| *PER1* | period circadian regulator 1 | -2.46 | 1.256E-100 |
| *FKBP5* | FKBP prolyl isomerase 5 | -2.07 | 2.89729E-11 |
| *GABRA5* | gamma-aminobutyric acid type A receptor subunit alpha5 | -1.94 | 2.12939E-08 |
| *TIMP4* | TIMP metallopeptidase inhibitor 4 | -1.79 | 3.84076E-07 |
| *HIF3A* | hypoxia inducible factor 3 subunit alpha | -1.79 | 3.14282E-07 |
| *MMP28* | matrix metallopeptidase 28 | -1.77 | 5.85E-08 |
| *INHBB* | inhibin subunit beta B | -1.76 | 3.97426E-08 |
| *ACKR2* | atypical chemokine receptor 2 | -1.73 | 6.90845E-13 |
| *PILRA* | paired immunoglobin like type 2 receptor alpha | -1.72 | 1.14664E-06 |
| *ANGPTL8* | angiopoietin like 8 | -1.70 | 2.08E-06 |
| *TMC2* | transmembrane channel like 2 | -1.68 | 1.11E-06 |
| *TENT5B* | terminal nucleotidyltransferase 5B | -1.65 | 6.41146E-10 |
| *NKD2* | NKD inhibitor of WNT signaling pathway 2 | -1.59 | 3.45E-17 |
| *DPT* | dermatopontin | -1.59 | 3.14E-07 |
| *C6* | complement C6 | -1.58 | 1.45E-05 |
| *ABCC2* | ATP binding cassette subfamily C member 2 | -1.58 | 1.30E-05 |
| *CRLF1* | cytokine receptor like factor 1 | -1.57 | 9.39E-09 |
| *APCDD1* | APC down-regulated 1 | -1.55 | 2.66E-10 |
| *CRISPLD2* | cysteine rich secretory protein LCCL domain containing 2 | -1.52 | 3.84E-07 |
| *LMO3* | LIM domain only 3 | -1.50 | 3.88E-07 |
| *CPM* | carboxypeptidase M | -1.49 | 2.22E-07 |
| *SAA1* | serum amyloid A1 | -1.49 | 3.08E-05 |
| *MAOA* | monoamine oxidase A | -1.47 | 2.94745E-05 |
| *NEGR1* | neuronal growth regulator 1 | -1.47 | 1.18E-08 |
| *SYN2* | synapsin II | -1.45 | 0.000125717 |
| *ATP1A2* | ATPase Na+/K+ transporting subunit alpha 2 | -1.41 | 0.000229046 |
| *PTGS1* | prostaglandin-endoperoxide synthase 1 | -1.40 | 1.09E-08 |
| *RASL11A* | RAS like family 11 member A | -1.37 | 1.57E-05 |
| *TSC22D3* | TSC22 domain family member 3 | -1.37 | 3.69E-14 |
| *AVPR1A* | arginine vasopressin receptor 1A | -1.34 | 6.05E-04 |
| *ANGPTL1* | angiopoietin like 1 | -1.24 | 6.11E-05 |
| *ISM1* | isthmin 1 | -1.23 | 0.002115835 |
| *TRNP1* | TMF1 regulated nuclear protein 1 | -1.22 | 1.76E-10 |
| *GLUL* | glutamate-ammonia ligase | -1.21 | 8.41E-05 |
| *CYP8B1* | cytochrome P450 family 8 subfamily B member 1 | -1.18 | 0.004345624 |
| *METTL7A* | methyltransferase like 7A | -1.17 | 1.47E-03 |
| *SLC16A12* | solute carrier family 16 member 12 | -1.16 | 0.004232885 |
| *GALNT15* | polypeptide N-acetylgalactosaminyltransferase 15 | -1.16 | 0.00514905 |
| *STC1* | stanniocalcin 1 | -1.15 | 0.005819803 |
| *FMO2* | flavin containing dimethylaniline monoxygenase 2 | -1.11 | 0.008659854 |
| *PLXNA4* | plexin A4 | -1.11 | 7.07688E-06 |
| *TMPRSS5* | transmembrane serine protease 5 | -1.10 | 0.010950504 |
| *SPARCL1* | SPARC like 1 | -1.10 | 3.29E-03 |
| *SMOC2* | SPARC related modular calcium binding 2 | -1.10 | 1.91E-04 |
| *LRP1B* | LDL receptor related protein 1B | -1.09 | 0.00514905 |
| *HPD* | 4-hydroxyphenylpyruvate dioxygenase | -1.08 | 0.013383227 |
| *GLYAT* | glycine-N-acyltransferase | -1.08 | 0.008749031 |
| *ELANE* | elastase, neutrophil expressed | -1.07 | 1.88E-04 |
| *F5* | coagulation factor V | -1.07 | 0.015627188 |
| *MT1X* | metallothionein 1X | -1.07 | 0.001130893 |
| *SERPINA3* | serpin family A member 3 | -1.06 | 0.013154664 |
| *PKD2L1* | polycystin 2 like 1, transient receptor potential cation channel | -1.06 | 1.19E-02 |
| *MGP* | matrix Gla protein | -1.05 | 0.016714274 |
| *WNT5A* | Wnt family member 5A | -1.05 | 0.010950504 |
| *DUSP4* | dual specificity phosphatase 4 | -1.04 | 0.000171262 |
| *PRODH* | proline dehydrogenase 1 | -1.04 | 0.018449532 |
| *KLF9* | Kruppel like factor 9 | -1.04 | 2.17E-07 |
| *GGT5* | gamma-glutamyltransferase 5 | -1.03 | 0.021127555 |
| *TMEM59L* | transmembrane protein 59 like | -1.03 | 9.34E-04 |
| *TF* | transferrin | -1.03 | 0.019267474 |
| *GSN* | gelsolin | -1.02 | 6.79E-03 |
| *PIK3R1* | phosphoinositide-3-kinase regulatory subunit 1 | -1.01 | 5.90E-04 |
| *CST3* | cystatin C | -1.00 | 0.010233937 |
| *RGMA* | repulsive guidance molecule BMP co-receptor a | -0.99 | 9.37536E-12 |
| *KIAA0040* | KIAA0040 | -0.98 | 0.033799174 |
| *CORO6* | coronin 6 | -0.98 | 0.010092135 |
| *TTYH1* | tweety family member 1 | -0.98 | 0.037970196 |
| *TAFA2* | TAFA chemokine like family member 2 | -0.97 | 1.25E-02 |
| *TRARG1* | trafficking regulator of GLUT4 (SLC2A4) 1 | -0.97 | 0.011926948 |
| *RASSF4* | Ras association domain family member 4 | -0.96 | 2.66E-04 |
| *SMARCD2* | SWI/SNF related, matrix associated, actin dependent regulator of chromatin, subfamily d, member 2 | -0.96 | 1.41963E-08 |
| *MAP2K6* | mitogen-activated protein kinase kinase 6 | -0.95 | 0.048141751 |
| *CACNB2* | calcium voltage-gated channel auxiliary subunit beta 2 | -0.95 | 0.009011383 |
| *TC2N* | tandem C2 domains, nuclear | -0.94 | 0.024554373 |
| *RAPGEF5* | Rap guanine nucleotide exchange factor 5 | -0.93 | 0.042389959 |
| *ERRFI1* | ERBB receptor feedback inhibitor 1 | -0.93 | 0.001332685 |
| *PRRT4* | proline rich transmembrane protein 4 | -0.93 | 0.003253894 |
| *HLX* | H2.0 like homeobox | -0.92 | 1.57858E-05 |
| *ANPEP* | alanyl aminopeptidase, membrane | -0.92 | 0.01006536 |
| *C1QTNF7* | C1q and TNF related 7 | -0.92 | 0.02339336 |
| *SLC2A13* | solute carrier family 2 member 13 | -0.91 | 0.046393557 |
| *BOC* | BOC cell adhesion associated, oncogene regulated | -0.91 | 0.032358485 |
| *NA* | NA | -0.91 | 0.048654705 |
| *SAMHD1* | SAM and HD domain containing deoxynucleoside triphosphate triphosphohydrolase 1 | -0.90 | 0.022109898 |
| *LAMA2* | laminin subunit alpha 2 | -0.89 | 0.000651072 |
| *ZNF395* | zinc finger protein 395 | -0.89 | 3.46852E-17 |
| *AACS* | acetoacetyl-CoA synthetase | -0.88 | 3.07E-02 |
| *CUTC* | cutC copper transporter | -0.87 | 0.008083892 |
| *STK17B* | serine/threonine kinase 17b | -0.87 | 0.020867511 |
| *AOX1* | aldehyde oxidase 1 | -0.86 | 0.045804255 |
| *OLFM2* | olfactomedin 2 | -0.86 | 0.000184629 |
| *GRK5* | G protein-coupled receptor kinase 5 | -0.86 | 0.008659854 |
| *LAMA3* | laminin subunit alpha 3 | -0.86 | 0.015627188 |
| *TMEM64* | transmembrane protein 64 | -0.86 | 0.009583854 |
| *PDE8B* | phosphodiesterase 8B | -0.83 | 6.81E-03 |
| *CDKN1C* | cyclin dependent kinase inhibitor 1C | -0.83 | 2.90E-02 |
| *HRCT1* | histidine rich carboxyl terminus 1 | -0.82 | 0.034232774 |
| *DNASE1L3* | deoxyribonuclease 1 like 3 | -0.82 | 0.045292682 |
| *TNS2* | tensin 2 | -0.81 | 2.57558E-08 |
| *SSH2* | slingshot protein phosphatase 2 | -0.81 | 0.02224363 |
| *GNG2* | G protein subunit gamma 2 | -0.80 | 0.032675774 |
| *IQCH-AS1* | IQCH antisense RNA 1 | -0.79 | 0.002346016 |
| *SOX13* | SRY-box transcription factor 13 | -0.79 | 0.016610242 |
| *SYNE2* | spectrin repeat containing nuclear envelope protein 2 | -0.79 | 0.047078744 |
| *WASF3* | WASP family member 3 | -0.79 | 2.61234E-05 |
| *RNASE4* | ribonuclease A family member 4 | -0.78 | 0.029687428 |
| *TGFBR2* | transforming growth factor beta receptor 2 | -0.77 | 4.43326E-10 |
| *NID1* | nidogen 1 | -0.74 | 1.94E-03 |
| *DUSP1* | dual specificity phosphatase 1 | -0.73 | 0.001559477 |
| *ZFP36* | ZFP36 ring finger protein | -0.73 | 0.001938233 |
| *MFGE8* | milk fat globule EGF and factor V/VIII domain containing | -0.72 | 0.002011495 |
| *CAB39L* | calcium binding protein 39 like | -0.72 | 0.039039489 |
| *DHRS3* | dehydrogenase/reductase 3 | -0.72 | 0.00122567 |
| *SLC25A10* | solute carrier family 25 member 10 | -0.71 | 0.047718206 |
| *EVA1C* | eva-1 homolog C | -0.71 | 0.048862069 |

**Supplementary Table 10.** DEGs from comparison of active beige and inactive beige adipocytes carrying FTO obesity-risk genotype; n=4 of each genotype

| **Symbol** | **Gene Name** | **Log2 Fold Change** | **Adj. P value** |
| --- | --- | --- | --- |
| *CPA4* | carboxypeptidase A4 | 1.53 | 2.12E-04 |
| *MAP3K7CL* | MAP3K7 C-terminal like | 1.42 | 2.60E-05 |
| *C3orf80* | chromosome 3 open reading frame 80 | 1.34 | 1.51E-03 |
| *FNDC1* | fibronectin type III domain containing 1 | 1.31 | 4.24E-03 |
| *MYL4* | myosin light chain 4 | 1.20 | 1.14E-02 |
| *KCNK15* | potassium two pore domain channel subfamily K member 15 | 1.19 | 1.17E-02 |
| *C1QTNF3* | C1q and TNF related 3 | 1.09 | 4.03E-02 |
| *ADGRG1* | adhesion G protein-coupled receptor G1 | 1.08 | 3.84E-02 |
| *GAP43* | growth associated protein 43 | 1.05 | 4.67E-02 |
| *E2F7* | E2F transcription factor 7 | 1.05 | 9.31E-03 |
| *RPLP0P2* | ribosomal protein lateral stalk subunit P0 pseudogene 2 | 1.03 | 0.048507883 |
| *SELPLG* | selectin P ligand | 1.01 | 3.45E-02 |
| *DOK5* | docking protein 5 | 0.98 | 1.31478E-05 |
| *MEST* | mesoderm specific transcript | 0.98 | 2.45E-02 |
| *CIART* | circadian associated repressor of transcription | 0.93 | 5.76E-03 |
| *STARD10* | StAR related lipid transfer domain containing 10 | 0.87 | 1.42E-02 |
| *SSC5D* | scavenger receptor cysteine rich family member with 5 domains | 0.86 | 3.89E-02 |
| *PLAU* | plasminogen activator, urokinase | 0.80 | 5.04E-03 |
| *ZBTB16* | zinc finger and BTB domain containing 16 | -4.46 | 1.60471E-74 |
| *GALNT15* | polypeptide N-acetylgalactosaminyltransferase 15 | -2.85 | 2.52E-26 |
| *FKBP5* | FKBP prolyl isomerase 5 | -2.75 | 1.25837E-38 |
| *HIF3A* | hypoxia inducible factor 3 subunit alpha | -2.57 | 1.20E-13 |
| *GGT5* | gamma-glutamyltransferase 5 | -2.45 | 1.5993E-19 |
| *LEP* | leptin | -2.44 | 2.21481E-18 |
| *PILRA* | paired immunoglobin like type 2 receptor alpha | -2.38 | 1.20227E-15 |
| *PER1* | period circadian regulator 1 | -2.27 | 2.21481E-18 |
| *GRIA1* | glutamate ionotropic receptor AMPA type subunit 1 | -2.26 | 1.63E-17 |
| *RAPGEF5* | Rap guanine nucleotide exchange factor 5 | -2.17 | 5.04E-09 |
| *ADRA1B* | adrenoceptor alpha 1B | -2.00 | 4.29943E-14 |
| *NEGR1* | neuronal growth regulator 1 | -2.00 | 8.53E-15 |
| *MAOA* | monoamine oxidase A | -1.92 | 1.28694E-09 |
| *CYP4B1* | cytochrome P450 family 4 subfamily B member 1 | -1.89 | 7.91E-07 |
| *CRISPLD2* | cysteine rich secretory protein LCCL domain containing 2 | -1.85 | 6.85088E-09 |
| *LMO3* | LIM domain only 3 | -1.82 | 3.94E-08 |
| *FGD4* | FYVE, RhoGEF and PH domain containing 4 | -1.82 | 5.34309E-09 |
| *GPX3* | glutathione peroxidase 3 | -1.78 | 7.0809E-06 |
| *PLXNA4* | plexin A4 | -1.76 | 5.03299E-08 |
| *INHBB* | inhibin subunit beta B | -1.76 | 2.25E-07 |
| *FMO2* | flavin containing dimethylaniline monoxygenase 2 | -1.69 | 2.02E-05 |
| *RASL11A* | RAS like family 11 member A | -1.69 | 9.70807E-07 |
| *SLC16A12* | solute carrier family 16 member 12 | -1.67 | 4.15847E-05 |
| *DPEP1* | dipeptidase 1 | -1.61 | 0.000103228 |
| *TIMP4* | TIMP metallopeptidase inhibitor 4 | -1.61 | 9.50598E-05 |
| *PRODH* | proline dehydrogenase 1 | -1.61 | 0.000103678 |
| *POM121L9P* | POM121 transmembrane nucleoporin like 9, pseudogene | -1.58 | 9.71E-06 |
| *ADARB1* | adenosine deaminase RNA specific B1 | -1.55 | 5.04E-09 |
| *NA* | NA | -1.52 | 0.000303833 |
| *VIT* | vitrin | -1.52 | 5.03299E-08 |
| *EPHB6* | EPH receptor B6 | -1.50 | 1.04E-04 |
| *ANGPTL1* | angiopoietin like 1 | -1.49 | 1.73E-06 |
| *LRRN3* | leucine rich repeat neuronal 3 | -1.47 | 0.000466681 |
| *MGP* | matrix Gla protein | -1.44 | 0.00060328 |
| *METTL7A* | methyltransferase like 7A | -1.43 | 0.000212293 |
| *ACKR2* | atypical chemokine receptor 2 | -1.42 | 0.000617651 |
| *IGF2* | insulin like growth factor 2 | -1.40 | 0.00111228 |
| *ART4* | ADP-ribosyltransferase 4 (inactive) (Dombrock blood group) | -1.37 | 0.001870234 |
| *HECW1* | HECT, C2 and WW domain containing E3 ubiquitin protein ligase 1 | -1.37 | 1.24E-04 |
| *SCARA5* | scavenger receptor class A member 5 | -1.37 | 0.002350735 |
| *NPR3* | natriuretic peptide receptor 3 | -1.35 | 5.81045E-06 |
| *GLUL* | glutamate-ammonia ligase | -1.32 | 2.94977E-06 |
| *KIAA0040* | KIAA0040 | -1.31 | 0.003788274 |
| *TSC22D3* | TSC22 domain family member 3 | -1.31 | 9.11628E-09 |
| *APCDD1* | APC down-regulated 1 | -1.30 | 0.002783793 |
| *SLA* | Src like adaptor | -1.30 | 0.004192613 |
| *LRP1B* | LDL receptor related protein 1B | -1.30 | 0.003937068 |
| *CRLF1* | cytokine receptor like factor 1 | -1.27 | 0.000138219 |
| *WASF3* | WASP family member 3 | -1.27 | 3.109E-15 |
| *CYP8B1* | cytochrome P450 family 8 subfamily B member 1 | -1.27 | 0.00566502 |
| *ERRFI1* | ERBB receptor feedback inhibitor 1 | -1.26 | 4.03827E-07 |
| *KLF9* | Kruppel like factor 9 | -1.25 | 6.00664E-11 |
| *NA* | NA | -1.24 | 0.000621609 |
| *GPM6B* | glycoprotein M6B | -1.24 | 0.008587625 |
| *GDF7* | growth differentiation factor 7 | -1.23 | 0.009956326 |
| *TENT5B* | terminal nucleotidyltransferase 5B | -1.23 | 0.000730265 |
| *WNT5A* | Wnt family member 5A | -1.23 | 0.003057797 |
| *STC1* | stanniocalcin 1 | -1.22 | 0.011366869 |
| *SOX13* | SRY-box transcription factor 13 | -1.22 | 4.41E-09 |
| *NGFR* | nerve growth factor receptor | -1.21 | 0.009122867 |
| *GREB1L* | GREB1 like retinoic acid receptor coactivator | -1.21 | 0.000467389 |
| *ADH1A* | alcohol dehydrogenase 1A (class I), alpha polypeptide | -1.21 | 0.011366869 |
| *RGCC* | regulator of cell cycle | -1.21 | 1.14E-02 |
| *CD34* | CD34 molecule | -1.20 | 0.014474888 |
| *ALOX5AP* | arachidonate 5-lipoxygenase activating protein | -1.20 | 1.14E-02 |
| *NEXN* | nexilin F-actin binding protein | -1.19 | 2.01059E-05 |
| *GUCY1A1* | guanylate cyclase 1 soluble subunit alpha 1 | -1.19 | 0.001682657 |
| *TACC1* | transforming acidic coiled-coil containing protein 1 | -1.18 | 2.21085E-07 |
| *APOB* | apolipoprotein B | -1.17 | 0.020311162 |
| *CPM* | carboxypeptidase M | -1.16 | 0.019372744 |
| *SMCO3* | single-pass membrane protein with coiled-coil domains 3 | -1.16 | 0.017528199 |
| *NEBL* | nebulette | -1.15 | 0.020962114 |
| *NID1* | nidogen 1 | -1.15 | 1.8104E-08 |
| *OMD* | osteomodulin | -1.14 | 0.023125643 |
| *MAOB* | monoamine oxidase B | -1.14 | 1.29E-02 |
| *NA* | NA | -1.12 | 0.006808232 |
| *CFD* | complement factor D | -1.12 | 0.001282946 |
| *C6* | complement C6 | -1.12 | 0.017236773 |
| *DSEL* | dermatan sulfate epimerase like | -1.12 | 1.76E-03 |
| *RGMA* | repulsive guidance molecule BMP co-receptor a | -1.11 | 0.000206401 |
| *LINC01088* | long intergenic non-protein coding RNA 1088 | -1.11 | 0.034162437 |
| *GUCY1B1* | guanylate cyclase 1 soluble subunit beta 1 | -1.10 | 0.015107554 |
| *TRNP1* | TMF1 regulated nuclear protein 1 | -1.10 | 0.00120906 |
| *TCEAL4* | transcription elongation factor A like 4 | -1.10 | 2.78E-06 |
| *TMC2* | transmembrane channel like 2 | -1.09 | 4.25E-02 |
| *DPT* | dermatopontin | -1.09 | 0.042483615 |
| *HLX* | H2.0 like homeobox | -1.08 | 2.23E-06 |
| *CDKN1C* | cyclin dependent kinase inhibitor 1C | -1.08 | 0.024503934 |
| *OLAH* | oleoyl-ACP hydrolase | -1.08 | 0.040638212 |
| *PIK3R1* | phosphoinositide-3-kinase regulatory subunit 1 | -1.08 | 0.040327671 |
| *NRCAM* | neuronal cell adhesion molecule | -1.08 | 0.04190168 |
| *IRS2* | insulin receptor substrate 2 | -1.07 | 0.000329481 |
| *RSPO1* | R-spondin 1 | -1.07 | 0.045696184 |
| *RNF144B* | ring finger protein 144B | -1.06 | 0.037658048 |
| *DNAJC6* | DnaJ heat shock protein family (Hsp40) member C6 | -1.05 | 0.000467389 |
| *ITPR1* | inositol 1,4,5-trisphosphate receptor type 1 | -1.05 | 0.00930819 |
| *DHRS3* | dehydrogenase/reductase 3 | -1.05 | 0.008570022 |
| *CST3* | cystatin C | -1.05 | 2.4235E-06 |
| *FOXO1* | forkhead box O1 | -1.04 | 0.00043938 |
| *RAB40A* | RAB40A, member RAS oncogene family | -1.04 | 0.042358847 |
| *TMEM119* | transmembrane protein 119 | -1.03 | 0.008587625 |
| *STK17B* | serine/threonine kinase 17b | -1.03 | 0.040327671 |
| *NAV2* | neuron navigator 2 | -1.02 | 0.003057797 |
| *TLR4* | toll like receptor 4 | -1.02 | 0.004507392 |
| *PLCL1* | phospholipase C like 1 (inactive) | -1.00 | 0.009287195 |
| *PRELP* | proline and arginine rich end leucine rich repeat protein | -1.00 | 0.014096681 |
| *COBLL1* | cordon-bleu WH2 repeat protein like 1 | -0.99 | 0.001219936 |
| *NFASC* | neurofascin | -0.99 | 2.21085E-07 |
| *TGFBR2* | transforming growth factor beta receptor 2 | -0.99 | 9.94915E-16 |
| *ANGPT1* | angiopoietin 1 | -0.98 | 0.017236773 |
| *SSH2* | slingshot protein phosphatase 2 | -0.97 | 0.000502181 |
| *ZNF395* | zinc finger protein 395 | -0.97 | 0.00159517 |
| *MINDY2* | MINDY lysine 48 deubiquitinase 2 | -0.96 | 0.000108694 |
| *TNS2* | tensin 2 | -0.96 | 0.000161324 |
| *PDE3A* | phosphodiesterase 3A | -0.96 | 0.011413361 |
| *SH3D19* | SH3 domain containing 19 | -0.95 | 0.013368087 |
| *CALCOCO2* | calcium binding and coiled-coil domain 2 | -0.95 | 0.000566645 |
| *ARMC2* | armadillo repeat containing 2 | -0.93 | 0.00159517 |
| *RASSF4* | Ras association domain family member 4 | -0.93 | 0.006062503 |
| *BMPR1B* | bone morphogenetic protein receptor type 1B | -0.93 | 0.022685107 |
| *CAB39L* | calcium binding protein 39 like | -0.92 | 0.00519468 |
| *SETBP1* | SET binding protein 1 | -0.91 | 0.000206401 |
| *ZHX3* | zinc fingers and homeoboxes 3 | -0.91 | 0.003813157 |
| *PARD3B* | par-3 family cell polarity regulator beta | -0.91 | 0.000354793 |
| *MT1X* | metallothionein 1X | -0.91 | 0.009984076 |
| *IRS1* | insulin receptor substrate 1 | -0.91 | 0.000114999 |
| *LAMA2* | laminin subunit alpha 2 | -0.90 | 0.038677568 |
| *COL5A3* | collagen type V alpha 3 chain | -0.90 | 7.90824E-05 |
| *JAK2* | Janus kinase 2 | -0.89 | 0.012378855 |
| *FOXO3* | forkhead box O3 | -0.89 | 2.4235E-06 |
| *ITGA1* | integrin subunit alpha 1 | -0.88 | 0.007903682 |
| *HPS5* | HPS5 biogenesis of lysosomal organelles complex 2 subunit 2 | -0.88 | 0.047592551 |
| *SPART* | spartin | -0.88 | 0.00281968 |
| *SERPING1* | serpin family G member 1 | -0.87 | 0.022949188 |
| *FAT4* | FAT atypical cadherin 4 | -0.86 | 0.038604148 |
| *EPN2* | epsin 2 | -0.86 | 0.009815046 |
| *ANG* | angiogenin | -0.86 | 0.000138725 |
| *PDGFRA* | platelet derived growth factor receptor alpha | -0.85 | 0.028791744 |
| *SMARCD2* | SWI/SNF related, matrix associated, actin dependent regulator of chromatin, subfamily d, member 2 | -0.84 | 1.81995E-05 |
| *FBLN2* | fibulin 2 | -0.83 | 0.028745433 |
| *NA* | NA | -0.83 | 0.005039655 |
| *RNASE4* | ribonuclease A family member 4 | -0.82 | 0.003862282 |
| *FOXN3* | forkhead box N3 | -0.80 | 5.5559E-06 |
| *ARRDC2* | arrestin domain containing 2 | -0.80 | 0.018317278 |
| *PRRG1* | proline rich and Gla domain 1 | -0.79 | 0.042711244 |
| *TP53I11* | tumor protein p53 inducible protein 11 | -0.78 | 0.012793999 |
| *FAM13A* | family with sequence similarity 13 member A | -0.77 | 3.14E-02 |
| *CUTC* | cutC copper transporter | -0.77 | 0.000125811 |
| *PTK2B* | protein tyrosine kinase 2 beta | -0.77 | 0.000103678 |
| *SIDT2* | SID1 transmembrane family member 2 | -0.77 | 9.76834E-05 |
| *LRP4* | LDL receptor related protein 4 | -0.76 | 0.011613502 |
| *PLEKHA2* | pleckstrin homology domain containing A2 | -0.75 | 0.029976761 |
| *CASTOR3* | CASTOR family member 3 | -0.74 | 1.13E-03 |
| *RELL1* | RELT like 1 | -0.73 | 0.000206401 |
| *FEZ2* | fasciculation and elongation protein zeta 2 | -0.73 | 0.001474034 |
| *AFF1* | AF4/FMR2 family member 1 | -0.73 | 0.040703416 |
| *CXCL12* | C-X-C motif chemokine ligand 12 | -0.71 | 0.009984076 |
| *PCYOX1* | prenylcysteine oxidase 1 | -0.71 | 0.002231091 |
